# Supplementary material for: Trends in Cardiovascular Disease–Related Mortality in Texas
Source: PubMed Central journal article supplement — Tex Heart Inst J. 2024 Dec 19;51(2):e248426. doi: 10.14503/THIJ-24-8426 (PMC11656160; doi:10.14503/thij-24-8426), 2024-12-19
Supplement: 10.14503_THIJ-24-8426.s1.pdf [file 10.14503_THIJ-24-8426.s1.pdf]

## Supplementary Materials

# Trends in Cardiovascular Disease-related Mortality in Texas

Muhammad Shariq Usman, MD<sup>1</sup>; Adeena Jamil, MBBS<sup>2</sup>; Zainali Chunawala, MD<sup>1</sup>; Mahboob Alam, MD<sup>3,4</sup>; Vijay Nambi, MD, PhD<sup>3,4,5</sup>; Layla A. Abushamat, MD, MPH<sup>3,6</sup>; Arunima Misra, MD<sup>3,4</sup>; Salim S. Virani, MD PhD<sup>6,7</sup>; Christie M Ballantyne, MD<sup>3,6</sup>; George E Taffet, MD<sup>3</sup>; Khurram Nasir, MD<sup>8</sup>; Sachin Goel, MD<sup>8</sup>; Sadeer Al-Kindi, MD<sup>8</sup>; Javed Butler, MD<sup>9,10</sup>; Abdul Mannan Khan Minhas, MD<sup>3,6</sup>

<sup>1</sup>Department of Medicine, UT Southwestern Medical Center, Dallas, Texas

<sup>2</sup>Department of Medicine, Dow International Medical College, Dow University of Health Sciences, Karachi, Pakistan.

<sup>3</sup>Department of Medicine, Baylor College of Medicine, Houston, Texas

<sup>4</sup>Section of Cardiology, Department of Medicine, Baylor College of Medicine, Houston, Texas

<sup>5</sup>Michael E. DeBakey VA Medical Center, Houston, Texas

<sup>6</sup>Section of Cardiovascular Research, Department of Medicine, Baylor College of Medicine, Houston, Texas

<sup>7</sup>Aga Khan University, Karachi, Pakistan; Baylor College of Medicine and The Texas Heart Institute, Houston, Texas

<sup>8</sup>Department of Cardiology, Houston Methodist Hospital, Texas

<sup>9</sup>Baylor Scott and White Research Institute, Dallas, Texas

<sup>10</sup>Department of Medicine, University of Mississippi School of Medicine, Jackson, Mississippi

**Citation:** *Tex Heart Inst J.* 2024;51(2):e248426. doi: 10.14503/THIJ-24-8426

### Corresponding author:

Muhammad Shariq Usman, MD, Department of Internal Medicine, University of Texas Southwestern Medical Center, 5323 Harry Hines Blvd, Dallas, TX 75390, USA (MuhammadShariq.Usman@UTSouthwestern.edu)

**Supplemental Table I.** Absolute number of CVD-related deaths stratified by sex in Texas and the United States, 1999-2019.

| Year         | Overall |          | Females |          | Males  |          | Population |            |
|--------------|---------|----------|---------|----------|--------|----------|------------|------------|
|              | Texas   | US       | Texas   | US       | Texas  | US       | Texas      | US         |
| <b>1999</b>  | 83330   | 1406043  | 44087   | 744631   | 39243  | 661412   | 12570920   | 180408769  |
| <b>2000</b>  | 84142   | 1399560  | 44523   | 743199   | 39619  | 656361   | 12766180   | 181984640  |
| <b>2001</b>  | 85267   | 1391438  | 44888   | 739783   | 40379  | 651655   | 13056316   | 184305128  |
| <b>2002</b>  | 86085   | 1399818  | 45120   | 740198   | 40965  | 659620   | 13289582   | 186208028  |
| <b>2003</b>  | 84582   | 1391183  | 43915   | 732915   | 40667  | 658268   | 13511001   | 188090429  |
| <b>2004</b>  | 82103   | 1349244  | 42322   | 706868   | 39781  | 642376   | 13765169   | 190205384  |
| <b>2005</b>  | 83531   | 1363870  | 43019   | 713315   | 40512  | 650555   | 14052824   | 192551384  |
| <b>2006</b>  | 82881   | 1338927  | 42617   | 695709   | 40264  | 643218   | 14448933   | 195019359  |
| <b>2007</b>  | 84064   | 1328579  | 42688   | 687561   | 41376  | 641018   | 14788973   | 197403777  |
| <b>2008</b>  | 85161   | 1346713  | 43072   | 695738   | 42089  | 650975   | 15121594   | 199795090  |
| <b>2009</b>  | 85386   | 1320188  | 42736   | 674164   | 42650  | 646024   | 15460294   | 202107016  |
| <b>2010</b>  | 88065   | 1334582  | 43989   | 679852   | 44076  | 654730   | 15706768   | 203891983  |
| <b>2011</b>  | 89368   | 1351755  | 44413   | 687083   | 44955  | 664672   | 16083645   | 206592936  |
| <b>2012</b>  | 92538   | 1361812  | 45597   | 687902   | 46941  | 673910   | 16390540   | 208826037  |
| <b>2013</b>  | 96496   | 1395118  | 47326   | 699755   | 49170  | 695363   | 16692444   | 211085314  |
| <b>2014</b>  | 99870   | 1406790  | 48712   | 699946   | 51158  | 706844   | 17093662   | 213809280  |
| <b>2015</b>  | 103792  | 1457516  | 50569   | 725312   | 53223  | 732204   | 17485690   | 216553817  |
| <b>2016</b>  | 105235  | 1473345  | 50611   | 726051   | 54624  | 747294   | 17800287   | 218641417  |
| <b>2017</b>  | 109678  | 1522191  | 52523   | 747396   | 57155  | 774795   | 18170130   | 221447331  |
| <b>2018</b>  | 113569  | 1548931  | 53919   | 754691   | 59650  | 794240   | 18507667   | 223311190  |
| <b>2019</b>  | 112023  | 1567590  | 52926   | 758861   | 59097  | 808729   | 18782771   | 224981167  |
| <b>Total</b> | 1937166 | 29455193 | 969572  | 15040930 | 967594 | 14414263 | 325545390  | 4247219476 |

**Supplemental Table II.** Absolute number of CVD-related deaths stratified by place of death in Texas and the United States, 1999-2019.

| Year         | Medical facility |                 | Nursing home/Long term care |                | Hospice      |               | Home          |                |
|--------------|------------------|-----------------|-----------------------------|----------------|--------------|---------------|---------------|----------------|
|              | Texas            | US              | Texas                       | US             | Texas        | US            | Texas         | US             |
| 1999         | 49151            | 761513          | 16502                       | 339983         | Missing      | Missing       | 15669         | 267707         |
| 2000         | 48336            | 745439          | 17088                       | 342824         | Missing      | Missing       | 16521         | 270885         |
| 2001         | 48274            | 731153          | 17303                       | 342598         | Missing      | Missing       | 16996         | 273034         |
| 2002         | 47979            | 722476          | 17564                       | 344370         | Missing      | Missing       | 17467         | 282929         |
| 2003         | 46470            | 701528          | 16959                       | 340295         | Suppressed   | 2356          | 17771         | 290752         |
| 2004         | 43842            | 668134          | 16456                       | 327895         | Suppressed   | 4213          | 17823         | 289893         |
| 2005         | 43330            | 665420          | 17028                       | 331937         | Suppressed   | 13725         | 18670         | 297661         |
| 2006         | 41703            | 642142          | 16840                       | 320054         | 2920         | 20197         | 18914         | 302580         |
| 2007         | 41662            | 627977          | 16720                       | 313517         | 3395         | 27512         | 19556         | 305164         |
| 2008         | 42143            | 618452          | 16975                       | 309557         | 3784         | 34439         | 19793         | 308359         |
| 2009         | 41471            | 584106          | 16442                       | 295295         | 4251         | 36843         | 20811         | 311704         |
| 2010         | 41207            | 592940          | 17442                       | 301617         | 4390         | 46350         | 22450         | 334766         |
| 2011         | 41027            | 588259          | 17705                       | 305687         | 4733         | 52791         | 23173         | 344083         |
| 2012         | 42002            | 576106          | 18389                       | 302205         | 5073         | 61383         | 24259         | 358022         |
| 2013         | 42605            | 578092          | 19272                       | 304097         | 4989         | 64010         | 26644         | 379297         |
| 2014         | 43350            | 575280          | 20072                       | 304178         | 4756         | 73051         | 28314         | 391391         |
| 2015         | 44505            | 585677          | 20986                       | 314077         | 5204         | 84216         | 29320         | 410955         |
| 2016         | 44690            | 584092          | 20672                       | 308617         | 5218         | 86932         | 30936         | 428052         |
| 2017         | 45759            | 593136          | 21676                       | 318850         | 5753         | 92260         | 32302         | 448196         |
| 2018         | 46330            | 596239          | 22250                       | 318479         | 5952         | 93786         | 34567         | 468439         |
| 2019         | 44502            | 594143          | 20910                       | 316289         | 5908         | 99231         | 35306         | 481305         |
| <b>Total</b> | <b>930338</b>    | <b>13332304</b> | <b>385251</b>               | <b>6702421</b> | <b>66334</b> | <b>893295</b> | <b>487262</b> | <b>7245174</b> |

**Supplemental Table III.** Annual percentage changes (APCs) in CVD-related AAMRs (CMRs for age groups) in Texas and the United States, 1999-2019.

|                              | Texas                                                                                                                            | US                                                                                                                                                                                 |
|------------------------------|----------------------------------------------------------------------------------------------------------------------------------|------------------------------------------------------------------------------------------------------------------------------------------------------------------------------------|
| <b>Overall</b>               | 1999-2009 APC -2.5* (95% CI, -2.8 to -2.1)<br>2009-2019 APC -0.2 (95% CI, -0.5 to 0.2).                                          | 1999-2011 APC -2.4* (95% CI, -2.5 to -2.2)<br>2011-2019 APC -0.1 (95% CI, -0.4 to 0.1).                                                                                            |
| <b>Sex</b>                   |                                                                                                                                  |                                                                                                                                                                                    |
| Male                         | 1999-2009 APC -2.5* (95% CI, -2.9 to -2.2)<br>2009-2019 APC 0 (95% CI, -0.3 to 0.3).                                             | 1999-2002 APC -1.9* (95% CI, -3.0 to -0.8)<br>2002-2007 APC -2.9* (95% CI, -3.6 to -2.2)<br>2007-2012 APC -1.7* (95% CI, -2.4 to -1.0)<br>2012-2019 APC 0.0 (95% CI, -0.3 to 0.3)  |
| Female                       | 1999-2009 APC -2.5* (95% CI, -2.9 to -2.1)<br>2009-2019 APC -0.5* (95% CI, -0.9 to -0.1).                                        | 1999-2002 APC -1.7* (95% CI, -3.0 to -0.3)<br>2001-2011 APC -2.6* (95% CI, -2.9 to -2.3)<br>2011-2019 APC -0.3* (95% CI, -0.6 to 0).                                               |
| <b>Race and ethnicity</b>    |                                                                                                                                  |                                                                                                                                                                                    |
| NH Black or African American | 1999-2002 APC 0 (95% CI, -2.6 to 2.7)<br>2002-2009 APC -3.6* (95% CI, -4.5 to -2.8)<br>2009-2019 APC -0.3 (95% CI, -0.7 to 0.1). | 1999-2003 APC -1.5* (95% CI, -2.0 to -0.9)<br>2003-2011 APC -3.0* (95% CI, -3.2 to -2.8),<br>2011-2014 APC -1.0 (95% CI, -2.7 to 0.7)<br>2014-2019 APC 0 (95% CI, -0.4 to 0.4).    |
| NH White                     | 1999-2009 APC -2.3* (95% CI, -2.6 to -1.9)<br>2009-2019 APC 0.2 (95% CI, -0.2 to 0.6).                                           | 1999-2002 APC -1.5* (95% CI, -2.8 to -0.3)<br>2002-2007 APC -2.8* (95% CI, -3.6 to -2.0)<br>2007-2012 APC -1.5* (95% CI, -2.3 to -0.7)<br>2012-2019 APC 0.2 (95% CI, -0.2 to 0.5). |
| Hispanic or Latino           | 1999-2009 APC -2.6* (95% CI, -3.2 to -2.1)<br>2009-2019 APC -0.6* (95% CI, -1.1 to -0.2).                                        | 1999-2012 APC -2.6* (95% CI, -2.8 to -2.4)<br>2012-2019 APC -0.4 (95% CI, -0.8 to 0).                                                                                              |
| <b>Age groups</b>            |                                                                                                                                  |                                                                                                                                                                                    |
| 25-39 years                  | 1999-2010 APC 0 (95% CI, -0.7 to 0.6)<br>2010-2019 APC 1.6* (95% CI, 0.8 to 2.5).                                                | 1999-2013 APC -0.3* (95% CI, -0.6 to 0)<br>2013-2019 APC 2.7* (95% CI, 1.7 to 3.6).                                                                                                |
| 40-54 years                  | 1999-2002 APC 2.1 (95% CI, -0.5 to 4.7)                                                                                          | 1999-2006 APC 0.2 (95% CI, -0.2 to 0.6)                                                                                                                                            |

|                                    |                                                                                                                                                                             |                                                                                                                                                                                  |
|------------------------------------|-----------------------------------------------------------------------------------------------------------------------------------------------------------------------------|----------------------------------------------------------------------------------------------------------------------------------------------------------------------------------|
|                                    | 2002-2008 APC -0.9 (95% CI, -2.0 to 0.2)<br>2008-2019 APC 0.3 (95% CI, 0 to 0.6).                                                                                           | 2006-2011 APC -0.9 (95% CI, -1.9 to 0)<br>2011-2019 APC 0.5* (95% CI, 0.2 to 0.8).                                                                                               |
| 55-69 years                        | 1999-2001 APC -1.1 (95% CI, -5.6 to 3.6)<br>2001-2006 APC -3.9* (95% CI, -5.3 to -2.6)<br>2006-2011 APC 0 (95% CI, -1.4 to 1.4)<br>2011-2019 APC 1.2* (95% CI, 1.1 to 1.4). | 1999-2006 APC -3.4* (95% CI, -3.7 to -3.2)<br>2006-2011 APC -1.5* (95% CI, -2.0 to -0.9), 2011-2019<br>APC 1.2* (95% CI, 1.1 to 1.4).                                            |
| 70-84 years                        | 1999-2002 APC -1.1 (95% CI, -3.1 to 0.9)<br>2002-2008 APC -3.4* (95% CI, -4.3 to -2.5)<br>2008-2019 APC -0.9* (95% CI, -1.1 to -0.6).                                       | 1999-2002 APC -1.9* (95% CI, -3.0 to -0.8)<br>2002-2012 APC -2.9* (95% CI, -3.1 to -2.7)<br>2012-2019 APC -1.0* (95% CI, -1.3 to -0.7).                                          |
| 85+ years                          | 1999-2011 APC -2.2* (95% CI, -2.6 to -1.9)<br>2011-2019 APC -0.4 (95% CI, -0.9 to 0.2).                                                                                     | 1999-2012 APC -2.1* (95% CI, -2.3 to -1.9)<br>2012-2019 APC -0.1 (95% CI, -0.7 to 0.4).                                                                                          |
| <b>Urbanization</b>                |                                                                                                                                                                             |                                                                                                                                                                                  |
| Metropolitan                       | APC -2.6* (95% CI, -3.0 to -2.2)<br>2009-2019 APC -0.3 (95% CI, -0.7 to 0.1).                                                                                               | 1999-2011 APC -2.5* (95% CI, -2.7 to -2.4)<br>2011-2019 APC -0.2 (95% CI, -0.5 to 0.1).                                                                                          |
| Nonmetropolitan                    | 1999-2002 APC -0.4 (95% CI, -2.1 to 1.4)<br>2002-2005 APC -3.2 (95% CI, -6.7 to 0.4)<br>2005-2010 APC -1.2 (95% CI, -2.3 to 0)<br>2010-2019 APC 0.5* (95% CI, 0.2 to 0.9).  | 1999-2011 APC -1.8* (95% CI, -2.0 to -1.6)<br>2011-2019 APC 0.3* (95% CI, 0 to 0.7).                                                                                             |
| <b>Cardiovascular disease type</b> |                                                                                                                                                                             |                                                                                                                                                                                  |
| HF/Cardiomyopathy                  | 1999-2011 APC -2.1* (95% CI, -2.4 to -1.9)<br>2011-2019 APC 1.0* (95% CI, 0.6 to 1.4).                                                                                      | 1999-2005 APC -1.9* (95% CI, -2.3 to -1.5)<br>2005-2009 APC -3.3* (95% CI, -4.6 to -1.9)<br>2009-2012 APC -1.3 (95% CI, -4.2 to 1.7)<br>2012-2019 APC 1.6* (95% CI, 1.2 to 1.9). |
| Ischemic heart disease             | 1999-2022 APC -2.6* (95% CI, -4.5 to -0.7)<br>2002-2008 APC -5.1* (95% CI, -6.0 to -4.2),<br>2008-2016 APC -2.3* (95% CI, -2.9 to -1.8)                                     | 1999-2002 APC -2.9* (95% CI, -4.1 to -1.7)<br>2002-2009 APC -4.2 (95% CI, -4.7 to -3.8)<br>2009-2014 APC -3.0* (95% CI, -3.8 to -2.2)                                            |

|                         |                                            |                                             |
|-------------------------|--------------------------------------------|---------------------------------------------|
|                         | 2016-2019 APC -0.3 (95% CI, -2.4 to 1.7).  | 2014-2019 APC -1.7* (95% CI, -2.3 to -1.1). |
| Cerebrovascular disease | 1999-2002 APC -1.9 (95% CI, -4.3 to 0.5)   | 1999-2002 APC -2.5* (95% CI, -3.9 to -1.1)  |
|                         | 2002-2006 APC -6.4* (95% CI, -8.8 to -3.9) | 2002-2007 APC -5.7* (95% CI, -6.6 to -4.8)  |
|                         | 2006-2011 APC -2.9* (95% CI, -4.5 to -1.4) | 2007-2012 APC -3.0* (95% CI, -3.9 to -2.1)  |
|                         | 2011-2019 APC -0.6 (95% CI, -1.1 to 0).    | 2012-2019 APC 0.3 (95% CI, -0.1 to 0.7).    |

---

\*Indicates that the annual percentage change (APC) is significantly different from zero at  $\alpha=0.05$ .

AAMR: age-adjusted mortality rates; CMR: Crude mortality rates; HF: heart failure; NH: Non-Hispanic

**Supplemental Table IV.** Overall and sex-stratified CVD-related age-adjusted mortality rates per 100,000 in Texas and the United States, 1999 to 2019.

| <b>Year</b>  | <b>Overall</b> |           | <b>Male</b>  |           | <b>Female</b> |           |
|--------------|----------------|-----------|--------------|-----------|---------------|-----------|
|              | <b>Texas</b>   | <b>US</b> | <b>Texas</b> | <b>US</b> | <b>Texas</b>  | <b>US</b> |
| <b>1999</b>  | 802.5          | 798.5     | 953.5        | 963.6     | 690.4         | 678.5     |
| <b>2000</b>  | 798.2          | 784.3     | 945.4        | 943.3     | 688.8         | 668.7     |
| <b>2001</b>  | 792.7          | 766.8     | 934.6        | 915.7     | 685.3         | 657       |
| <b>2002</b>  | 786.8          | 760.1     | 927.8        | 909.4     | 681.5         | 650       |
| <b>2003</b>  | 756.2          | 742.5     | 892.4        | 886.2     | 652.2         | 635.1     |
| <b>2004</b>  | 718.4          | 709.2     | 847          | 846.4     | 619           | 606.3     |
| <b>2005</b>  | 710            | 702.4     | 833.5        | 835.8     | 613.2         | 601.1     |
| <b>2006</b>  | 679.3          | 675       | 794.8        | 804.2     | 589.3         | 576.2     |
| <b>2007</b>  | 670.3          | 655.8     | 790.4        | 781.2     | 576.7         | 559.2     |
| <b>2008</b>  | 660.1          | 650.9     | 774.4        | 773.6     | 568.8         | 555.8     |
| <b>2009</b>  | 641.1          | 625.2     | 755.7        | 747.8     | 549.9         | 530.3     |
| <b>2010</b>  | 646.9          | 621.2     | 764.4        | 743.8     | 554.3         | 526.1     |
| <b>2011</b>  | 629.3          | 611.6     | 739.8        | 729.3     | 538.7         | 518.8     |
| <b>2012</b>  | 631.1          | 601.4     | 746.8        | 718.3     | 537.6         | 509       |
| <b>2013</b>  | 636.4          | 602.1     | 753.1        | 719.4     | 542           | 508.4     |
| <b>2014</b>  | 635.5          | 593.6     | 752.5        | 710.5     | 540.1         | 499.8     |
| <b>2015</b>  | 639            | 601.4     | 755.2        | 716.8     | 543.7         | 507.9     |
| <b>2016</b>  | 626.7          | 596       | 749.4        | 713.6     | 527.1         | 500.5     |
| <b>2017</b>  | 636            | 602.2     | 758.9        | 720.8     | 534.9         | 505.7     |
| <b>2018</b>  | 641.1          | 599.7     | 767.3        | 719.5     | 536.6         | 501.3     |
| <b>2019</b>  | 615.2          | 595.6     | 736.5        | 715.6     | 514.1         | 496.6     |
| <b>Total</b> | 674.1          | 654       | 795.2        | 779.4     | 577.3         | 555.8     |

**Supplemental Table V.** CVD-related age-adjusted mortality rates per 100,000 stratified by race/ethnicity in Texas and the United States, 1999-2019.

| Year         | NH Black or African American |        | NH White |       | Hispanic or Latino |       |
|--------------|------------------------------|--------|----------|-------|--------------------|-------|
|              | Texas                        | US     | Texas    | US    | Texas              | US    |
| 1999         | 1097                         | 1074.4 | 791.1    | 779.2 | 702                | 654.9 |
| 2000         | 1078.8                       | 1052.2 | 788.1    | 767.5 | 706                | 636.9 |
| 2001         | 1107.8                       | 1040.1 | 781.3    | 749.5 | 703.1              | 632.9 |
| 2002         | 1095.7                       | 1027.4 | 775.2    | 744.4 | 706.1              | 615.9 |
| 2003         | 1067.5                       | 1010.7 | 748.2    | 727   | 659                | 603.6 |
| 2004         | 1004.5                       | 974    | 712.8    | 694.8 | 623.2              | 573.4 |
| 2005         | 984.1                        | 958.8  | 698.3    | 688.2 | 649.6              | 581.1 |
| 2006         | 906.9                        | 918.8  | 672.7    | 662.5 | 601                | 551.8 |
| 2007         | 905.7                        | 895.3  | 670.2    | 644.7 | 590.1              | 532.7 |
| 2008         | 887                          | 869.1  | 668.7    | 643   | 565.7              | 517.9 |
| 2009         | 846.4                        | 834.2  | 641.9    | 617.9 | 557.7              | 495.8 |
| 2010         | 843.9                        | 818.7  | 654.1    | 614.9 | 564.2              | 499   |
| 2011         | 849.9                        | 795.2  | 636.6    | 609.3 | 542.2              | 479.2 |
| 2012         | 825.5                        | 780.4  | 641.3    | 599.5 | 546.5              | 471.7 |
| 2013         | 825.8                        | 781.6  | 649.5    | 601   | 550.7              | 472.2 |
| 2014         | 837.5                        | 765.9  | 652.5    | 594.9 | 539                | 458.5 |
| 2015         | 836.1                        | 766.7  | 656.4    | 604.4 | 543.6              | 460.6 |
| 2016         | 821.6                        | 768.3  | 649.7    | 599.4 | 526.2              | 458.6 |
| 2017         | 828.1                        | 769.5  | 658.7    | 607.6 | 540.1              | 460   |
| 2018         | 838.6                        | 771.9  | 668.7    | 605.2 | 534.8              | 457.8 |
| 2019         | 801.8                        | 764.2  | 643.3    | 602.3 | 517.6              | 456.8 |
| <b>Total</b> | 900.3                        | 861    | 683.3    | 649.9 | 575.5              | 506.2 |

NH: Non-Hispanic



**Supplemental Table VI.** Rate ratios for CVD-related age-adjusted mortality rates in Texas and United States, 1999-2019.

| Year                   | Texas      |        |        | US         |        |        |
|------------------------|------------|--------|--------|------------|--------|--------|
|                        | Rate ratio | 95% CI | 95% CI | Rate ratio | 95% CI | 95% CI |
| <b>Female</b>          | Reference  |        |        | Reference  |        |        |
| <b>Male</b>            | 1.38       | 1.38   | 1.38   | 1.40       | 1.40   | 1.41   |
| <b>NH White</b>        | Reference  |        |        | Reference  |        |        |
| <b>NH Black/AA</b>     | 1.32       | 1.32   | 1.32   | 1.32       | 1.32   | 1.33   |
| <b>Hispanic</b>        | 0.84       | 0.84   | 0.84   | 0.78       | 0.78   | 0.78   |
| <b>Metropolitan</b>    | Reference  |        |        | Reference  |        |        |
| <b>Nonmetropolitan</b> | 1.14       | 1.14   | 1.14   | 1.14       | 1.13   | 1.14   |

**Supplemental Table VII.** CVD-related crude mortality rates per 100,000 stratified by age in Texas and the United States, 1999-2019.

| Year         | 25-39 years |      | 40-54 years |       | 55-69 years |       | 70-84 years |        | 85+ years |         |
|--------------|-------------|------|-------------|-------|-------------|-------|-------------|--------|-----------|---------|
|              | Texas       | US   | Texas       | US    | Texas       | US    | Texas       | US     | Texas     | US      |
| <b>1999</b>  | 26          | 29.9 | 142.8       | 148.6 | 686.8       | 683.6 | 2901.7      | 2887.4 | 11196.2   | 11141.4 |
| <b>2000</b>  | 24.4        | 27.6 | 141.5       | 147.1 | 675.9       | 661.7 | 2885.4      | 2836.2 | 11221.3   | 11047.2 |
| <b>2001</b>  | 26.1        | 28.4 | 146.6       | 145.6 | 669.4       | 639.1 | 2851        | 2768.5 | 11155.4   | 10873.5 |
| <b>2002</b>  | 25.1        | 28.8 | 152         | 148.9 | 648.2       | 615   | 2835.3      | 2737.2 | 11094.2   | 10898.9 |
| <b>2003</b>  | 28          | 29   | 148.1       | 150.2 | 619.1       | 597   | 2731.8      | 2670.9 | 10593.6   | 10658.4 |
| <b>2004</b>  | 24.9        | 29   | 144.4       | 148.9 | 594         | 566.2 | 2576.1      | 2555   | 10101.8   | 10146.2 |
| <b>2005</b>  | 25.3        | 29   | 144.9       | 149.4 | 567.3       | 555.3 | 2560.1      | 2516.2 | 10053.1   | 10148.7 |
| <b>2006</b>  | 25.7        | 29.1 | 148.4       | 149.4 | 551.4       | 539.5 | 2407.9      | 2406.2 | 9618      | 9678.9  |
| <b>2007</b>  | 25.5        | 28.4 | 143.5       | 147   | 549.2       | 524.8 | 2366.5      | 2328.3 | 9558.8    | 9431.1  |
| <b>2008</b>  | 24.7        | 28.2 | 140.6       | 146.3 | 549.1       | 522.7 | 2327.9      | 2296.5 | 9378      | 9414.4  |
| <b>2009</b>  | 26          | 28.3 | 143.7       | 146.9 | 543.1       | 509.7 | 2257.5      | 2191.1 | 8921.5    | 8914.1  |
| <b>2010</b>  | 25.6        | 27.7 | 141.9       | 142.6 | 548.8       | 506.3 | 2254.6      | 2152.3 | 9149.7    | 9014.3  |
| <b>2011</b>  | 25.9        | 27.8 | 142.1       | 143.2 | 545         | 500.4 | 2184        | 2110.2 | 8743.4    | 8800.6  |
| <b>2012</b>  | 26.4        | 27.6 | 140.1       | 141.1 | 547         | 502.2 | 2197.9      | 2048.2 | 8756.3    | 8692.5  |
| <b>2013</b>  | 26.4        | 27.8 | 145.3       | 144.7 | 562.9       | 508.3 | 2196.5      | 2026.9 | 8733.5    | 8651    |
| <b>2014</b>  | 27.9        | 28.7 | 147.7       | 144.8 | 567.4       | 512.7 | 2188        | 1977.3 | 8623.7    | 8476    |
| <b>2015</b>  | 28.3        | 29.2 | 146.2       | 145.4 | 581.8       | 521.4 | 2168.7      | 1987.6 | 8730.9    | 8662.8  |
| <b>2016</b>  | 26.8        | 30.7 | 143.8       | 148.1 | 582.7       | 530.8 | 2124.6      | 1956.8 | 8539.4    | 8491.1  |
| <b>2017</b>  | 29.3        | 31.7 | 148         | 147   | 587.9       | 538.7 | 2131.1      | 1939.3 | 8620.3    | 8636.3  |
| <b>2018</b>  | 29          | 31.9 | 145.2       | 147.3 | 600.5       | 543.9 | 2126.2      | 1919   | 8768.8    | 8580.8  |
| <b>2019</b>  | 29.3        | 31.9 | 145.7       | 146.9 | 584.5       | 546.9 | 2024.2      | 1896.9 | 8310.7    | 8479.1  |
| <b>Total</b> | 26.6        | 29.1 | 144.9       | 146.6 | 582.9       | 546.1 | 2356.2      | 2267.4 | 9346.1    | 9327.9  |

**Supplemental Table VIII.** CVD-related age-adjusted mortality rates per 100,000 stratified by urban-rural classification in Texas and the United States, 1999-2019.

| Year         | Nonmetropolitan |       | Metropolitan |       |
|--------------|-----------------|-------|--------------|-------|
|              | Texas           | US    | Texas        | US    |
| 1999         | 839.8           | 837.1 | 794.4        | 789.6 |
| 2000         | 828.6           | 825.3 | 791.8        | 775   |
| 2001         | 830.2           | 809.3 | 784.5        | 757.3 |
| 2002         | 833             | 810.9 | 776.7        | 748.8 |
| 2003         | 794.5           | 796.2 | 748.1        | 730.6 |
| 2004         | 772.1           | 760.9 | 706.8        | 698   |
| 2005         | 755.8           | 760.6 | 699.8        | 689.7 |
| 2006         | 730.1           | 730.3 | 668.8        | 663.2 |
| 2007         | 739.7           | 717   | 655.8        | 642.7 |
| 2008         | 726.5           | 721.3 | 646.7        | 635.9 |
| 2009         | 714.3           | 697.6 | 626.7        | 610   |
| 2010         | 702.7           | 693.1 | 636.4        | 606.2 |
| 2011         | 703.2           | 686.9 | 615.8        | 596.2 |
| 2012         | 715.5           | 679.6 | 615.7        | 585.6 |
| 2013         | 725.6           | 682.8 | 620.9        | 585.9 |
| 2014         | 720.1           | 679.1 | 621          | 576.8 |
| 2015         | 739.5           | 692.7 | 622          | 583.5 |
| 2016         | 721.9           | 686.7 | 611.1        | 578.5 |
| 2017         | 742.1           | 694.9 | 618.8        | 584.5 |
| 2018         | 740.4           | 694.3 | 625.6        | 581.7 |
| 2019         | 732.3           | 695.6 | 596.5        | 576.7 |
| <b>Total</b> | 750.9           | 727   | 659.4        | 638.9 |

**Supplemental Table IX.** CVD-related mortality in the United States, 1999-2019.

| <b>State</b>         | <b>Rank</b> | <b>Percentile</b> | <b>AAMR per<br/>100,000</b> |
|----------------------|-------------|-------------------|-----------------------------|
| <b>Arizona</b>       | 1           | 0                 | 530.4                       |
| <b>Minnesota</b>     | 2           | 2                 | 536.5                       |
| <b>Utah</b>          | 3           | 4                 | 536.6                       |
| <b>Hawaii</b>        | 4           | 6                 | 539.4                       |
| <b>Colorado</b>      | 5           | 8                 | 543.6                       |
| <b>Alaska</b>        | 6           | 10                | 552.5                       |
| <b>Montana</b>       | 7           | 12                | 559.9                       |
| <b>Florida</b>       | 8           | 14                | 564.4                       |
| <b>Massachusetts</b> | 9           | 16                | 565.8                       |
| <b>New Mexico</b>    | 10          | 18                | 570.6                       |
| <b>New Hampshire</b> | 11          | 20                | 579.6                       |
| <b>Maine</b>         | 12          | 22                | 579.9                       |
| <b>Idaho</b>         | 13          | 24                | 580.5                       |
| <b>Oregon</b>        | 14          | 26                | 580.9                       |
| <b>Washington</b>    | 15          | 28                | 581.4                       |
| <b>Wisconsin</b>     | 16          | 30                | 582.6                       |
| <b>Wyoming</b>       | 17          | 32                | 583.1                       |
| <b>Virginia</b>      | 18          | 34                | 595.8                       |
| <b>South Dakota</b>  | 19          | 36                | 597.5                       |
| <b>Iowa</b>          | 20          | 38                | 603.4                       |
| <b>Illinois</b>      | 21          | 40                | 614.1                       |
| <b>North Dakota</b>  | 22          | 42                | 615.8                       |
| <b>Kansas</b>        | 23          | 44                | 616.5                       |
| <b>Delaware</b>      | 24          | 46                | 616.7                       |
| <b>Connecticut</b>   | 25          | 48                | 621.8                       |
| <b>New Jersey</b>    | 26          | 50                | 622.3                       |

|                             |    |     |       |
|-----------------------------|----|-----|-------|
| <b>Vermont</b>              | 27 | 52  | 622.8 |
| <b>Maryland</b>             | 28 | 54  | 635.9 |
| <b>Pennsylvania</b>         | 29 | 56  | 655.8 |
| <b>Rhode Island</b>         | 30 | 58  | 656.1 |
| <b>Nebraska</b>             | 31 | 60  | 659.1 |
| <b>North Carolina</b>       | 32 | 62  | 661.2 |
| <b>California</b>           | 33 | 64  | 664.3 |
| <b>Nevada</b>               | 34 | 66  | 672.8 |
| <b>Texas</b>                | 35 | 68  | 674.1 |
| <b>Missouri</b>             | 36 | 70  | 680.1 |
| <b>Michigan</b>             | 37 | 72  | 681.9 |
| <b>Indiana</b>              | 38 | 74  | 693.4 |
| <b>District of Columbia</b> | 39 | 76  | 706.6 |
| <b>South Carolina</b>       | 40 | 78  | 708.3 |
| <b>Louisiana</b>            | 41 | 80  | 710.5 |
| <b>New York</b>             | 42 | 82  | 713.5 |
| <b>Ohio</b>                 | 43 | 84  | 735.8 |
| <b>Georgia</b>              | 44 | 86  | 739.5 |
| <b>Tennessee</b>            | 45 | 88  | 753.8 |
| <b>Arkansas</b>             | 46 | 90  | 764.6 |
| <b>Kentucky</b>             | 47 | 92  | 765.3 |
| <b>Alabama</b>              | 48 | 94  | 777.3 |
| <b>West Virginia</b>        | 49 | 96  | 820.7 |
| <b>Oklahoma</b>             | 50 | 98  | 830.4 |
| <b>Mississippi</b>          | 51 | 100 | 902.2 |

---

AAMR: Age-adjusted mortality rate

**Supplemental Table X.** CVD-related mortality stratified by counties in Texas, 1999-2019.

| <b>COUNTY</b>                | <b>AAMR per<br/>100,000</b> | <b>Rank</b> | <b>Percentile</b> |
|------------------------------|-----------------------------|-------------|-------------------|
| <b>Presidio County, TX</b>   | 359.9                       | 1           | 0                 |
| <b>Borden County, TX</b>     | 437                         | 2           | 0.3984064         |
| <b>Glasscock County, TX</b>  | 437.7                       | 3           | 0.7968128         |
| <b>Jeff Davis County, TX</b> | 446.5                       | 4           | 1.195219          |
| <b>Hudspeth County, TX</b>   | 451.5                       | 5           | 1.593626          |
| <b>Brewster County, TX</b>   | 490.8                       | 6           | 1.992032          |
| <b>Irion County, TX</b>      | 492.4                       | 7           | 2.390438          |
| <b>Collin County, TX</b>     | 494.6                       | 8           | 2.788845          |
| <b>Williamson County, TX</b> | 497.2                       | 9           | 3.187251          |
| <b>Bandera County, TX</b>    | 523.6                       | 10          | 3.585657          |
| <b>Llano County, TX</b>      | 525.4                       | 11          | 3.984064          |
| <b>Fort Bend County, TX</b>  | 525.6                       | 12          | 4.38247           |
| <b>Travis County, TX</b>     | 529.5                       | 13          | 4.780877          |
| <b>Hartley County, TX</b>    | 535.9                       | 14          | 5.179283          |
| <b>Mason County, TX</b>      | 536.7                       | 15          | 5.577689          |
| <b>Denton County, TX</b>     | 545.7                       | 16          | 5.976096          |
| <b>Washington County, TX</b> | 552.3                       | 17          | 6.374502          |
| <b>Kinney County, TX</b>     | 552.5                       | 18          | 6.772908          |
| <b>Edwards County, TX</b>    | 559.3                       | 19          | 7.171315          |
| <b>McMullen County, TX</b>   | 559.4                       | 20          | 7.569721          |
| <b>Zapata County, TX</b>     | 559.8                       | 21          | 7.968128          |
| <b>Gillespie County, TX</b>  | 561.5                       | 22          | 8.366534          |
| <b>Cameron County, TX</b>    | 561.8                       | 23          | 8.76494           |
| <b>Hidalgo County, TX</b>    | 561.8                       | 23          | 8.76494           |
| <b>Hays County, TX</b>       | 565.8                       | 25          | 9.561753          |
| <b>Live Oak County, TX</b>   | 571.5                       | 26          | 9.960159          |

|                              |       |    |          |
|------------------------------|-------|----|----------|
| <b>Midland County, TX</b>    | 578.1 | 27 | 10.35857 |
| <b>Kerr County, TX</b>       | 582.6 | 28 | 10.75697 |
| <b>Goliad County, TX</b>     | 583.1 | 29 | 11.15538 |
| <b>Culberson County, TX</b>  | 584.1 | 30 | 11.55379 |
| <b>Comal County, TX</b>      | 585.2 | 31 | 11.95219 |
| <b>Sterling County, TX</b>   | 593.3 | 32 | 12.3506  |
| <b>Rockwall County, TX</b>   | 601   | 33 | 12.749   |
| <b>Burnet County, TX</b>     | 604.9 | 34 | 13.14741 |
| <b>Somervell County, TX</b>  | 612.4 | 35 | 13.54582 |
| <b>Blanco County, TX</b>     | 613.1 | 36 | 13.94422 |
| <b>Briscoe County, TX</b>    | 615.2 | 37 | 14.34263 |
| <b>Willacy County, TX</b>    | 615.7 | 38 | 14.74104 |
| <b>Castro County, TX</b>     | 618.2 | 39 | 15.13944 |
| <b>Randall County, TX</b>    | 618.7 | 40 | 15.53785 |
| <b>El Paso County, TX</b>    | 621   | 41 | 15.93626 |
| <b>Maverick County, TX</b>   | 621.1 | 42 | 16.33466 |
| <b>Wilson County, TX</b>     | 627.6 | 43 | 16.73307 |
| <b>Hardeman County, TX</b>   | 628.3 | 44 | 17.13147 |
| <b>Scurry County, TX</b>     | 633.4 | 45 | 17.52988 |
| <b>Webb County, TX</b>       | 634.9 | 46 | 17.92829 |
| <b>Caldwell County, TX</b>   | 639.8 | 47 | 18.32669 |
| <b>San Saba County, TX</b>   | 640.5 | 48 | 18.7251  |
| <b>Starr County, TX</b>      | 642.8 | 49 | 19.12351 |
| <b>Montgomery County, TX</b> | 643.2 | 50 | 19.52191 |
| <b>Mills County, TX</b>      | 643.4 | 51 | 19.92032 |
| <b>Sherman County, TX</b>    | 644   | 52 | 20.31873 |
| <b>Calhoun County, TX</b>    | 647.2 | 53 | 20.71713 |
| <b>Guadalupe County, TX</b>  | 647.2 | 53 | 20.71713 |
| <b>Brazos County, TX</b>     | 648.1 | 55 | 21.51394 |
| <b>Dimmit County, TX</b>     | 648.2 | 56 | 21.91235 |

|                                |       |    |          |
|--------------------------------|-------|----|----------|
| <b>Harris County, TX</b>       | 648.2 | 56 | 21.91235 |
| <b>Kenedy County, TX</b>       | 651   | 58 | 22.70916 |
| <b>Val Verde County, TX</b>    | 651.5 | 59 | 23.10757 |
| <b>Franklin County, TX</b>     | 651.6 | 60 | 23.50598 |
| <b>Brazoria County, TX</b>     | 652.1 | 61 | 23.90438 |
| <b>Dallas County, TX</b>       | 654.6 | 62 | 24.30279 |
| <b>Lavaca County, TX</b>       | 657.1 | 63 | 24.70119 |
| <b>Kimble County, TX</b>       | 658.9 | 64 | 25.0996  |
| <b>Kendall County, TX</b>      | 659.3 | 65 | 25.49801 |
| <b>Deaf Smith County, TX</b>   | 660.8 | 66 | 25.89641 |
| <b>Archer County, TX</b>       | 661.7 | 67 | 26.29482 |
| <b>Erath County, TX</b>        | 666.3 | 68 | 26.69323 |
| <b>Uvalde County, TX</b>       | 667.2 | 69 | 27.09163 |
| <b>Victoria County, TX</b>     | 667.3 | 70 | 27.49004 |
| <b>Bastrop County, TX</b>      | 668.4 | 71 | 27.88845 |
| <b>Smith County, TX</b>        | 670.7 | 72 | 28.28685 |
| <b>Hansford County, TX</b>     | 671.1 | 73 | 28.68526 |
| <b>Terrell County, TX</b>      | 671.8 | 74 | 29.08367 |
| <b>Fayette County, TX</b>      | 673.5 | 75 | 29.48207 |
| <b>Hemphill County, TX</b>     | 675.7 | 76 | 29.88048 |
| <b>Lee County, TX</b>          | 676.6 | 77 | 30.27888 |
| <b>Tarrant County, TX</b>      | 678.2 | 78 | 30.67729 |
| <b>Hood County, TX</b>         | 678.5 | 79 | 31.0757  |
| <b>Reeves County, TX</b>       | 680.3 | 80 | 31.4741  |
| <b>Throckmorton County, TX</b> | 681.6 | 81 | 31.87251 |
| <b>Oldham County, TX</b>       | 683   | 82 | 32.27092 |
| <b>Menard County, TX</b>       | 683.3 | 83 | 32.66932 |
| <b>Walker County, TX</b>       | 683.5 | 84 | 33.06773 |
| <b>Lipscomb County, TX</b>     | 684.4 | 85 | 33.46614 |
| <b>Parmer County, TX</b>       | 685.4 | 86 | 33.86454 |



|                               |       |     |          |
|-------------------------------|-------|-----|----------|
| <b>Waller County, TX</b>      | 687.4 | 87  | 34.26295 |
| <b>Carson County, TX</b>      | 687.9 | 88  | 34.66135 |
| <b>Fisher County, TX</b>      | 688.3 | 89  | 35.05976 |
| <b>Nueces County, TX</b>      | 689.1 | 90  | 35.45817 |
| <b>San Jacinto County, TX</b> | 689.2 | 91  | 35.85658 |
| <b>Medina County, TX</b>      | 691.5 | 92  | 36.25498 |
| <b>Tom Green County, TX</b>   | 692.8 | 93  | 36.65339 |
| <b>Hale County, TX</b>        | 695.1 | 94  | 37.05179 |
| <b>Armstrong County, TX</b>   | 695.8 | 95  | 37.4502  |
| <b>Gaines County, TX</b>      | 697.9 | 96  | 37.84861 |
| <b>Burleson County, TX</b>    | 698.9 | 97  | 38.24701 |
| <b>Milam County, TX</b>       | 700.1 | 98  | 38.64542 |
| <b>Hamilton County, TX</b>    | 700.6 | 99  | 39.04382 |
| <b>Coleman County, TX</b>     | 701.2 | 100 | 39.44223 |
| <b>Ellis County, TX</b>       | 701.9 | 101 | 39.84064 |
| <b>Gonzales County, TX</b>    | 702.8 | 102 | 40.23904 |
| <b>Zavala County, TX</b>      | 703.4 | 103 | 40.63745 |
| <b>Swisher County, TX</b>     | 706.6 | 104 | 41.03586 |
| <b>Freestone County, TX</b>   | 706.8 | 105 | 41.43426 |
| <b>Cooke County, TX</b>       | 707   | 106 | 41.83267 |
| <b>Yoakum County, TX</b>      | 707   | 106 | 41.83267 |
| <b>Leon County, TX</b>        | 708.3 | 108 | 42.62948 |
| <b>Bell County, TX</b>        | 710.2 | 109 | 43.02789 |
| <b>Garza County, TX</b>       | 711   | 110 | 43.4263  |
| <b>Rains County, TX</b>       | 712.2 | 111 | 43.8247  |
| <b>Foard County, TX</b>       | 712.9 | 112 | 44.22311 |
| <b>Lampasas County, TX</b>    | 713.5 | 113 | 44.62151 |
| <b>Sutton County, TX</b>      | 714.2 | 114 | 45.01992 |
| <b>Parker County, TX</b>      | 714.7 | 115 | 45.41833 |
| <b>Haskell County, TX</b>     | 715.7 | 116 | 45.81673 |

|                               |       |     |          |
|-------------------------------|-------|-----|----------|
| <b>Cottle County, TX</b>      | 716.4 | 117 | 46.21514 |
| <b>Pecos County, TX</b>       | 717.4 | 118 | 46.61354 |
| <b>Galveston County, TX</b>   | 719   | 119 | 47.01195 |
| <b>Bexar County, TX</b>       | 719.9 | 120 | 47.41036 |
| <b>Aransas County, TX</b>     | 720.3 | 121 | 47.80877 |
| <b>Wood County, TX</b>        | 721.9 | 122 | 48.20717 |
| <b>Concho County, TX</b>      | 722   | 123 | 48.60558 |
| <b>Bee County, TX</b>         | 722.2 | 124 | 49.00398 |
| <b>Floyd County, TX</b>       | 723.6 | 125 | 49.40239 |
| <b>Motley County, TX</b>      | 725.6 | 126 | 49.8008  |
| <b>Stonewall County, TX</b>   | 727.7 | 127 | 50.1992  |
| <b>Hopkins County, TX</b>     | 733   | 128 | 50.59761 |
| <b>Lubbock County, TX</b>     | 733.1 | 129 | 50.99602 |
| <b>Real County, TX</b>        | 733.3 | 130 | 51.39442 |
| <b>Comanche County, TX</b>    | 733.9 | 131 | 51.79283 |
| <b>McLennan County, TX</b>    | 734.1 | 132 | 52.19123 |
| <b>Shackelford County, TX</b> | 734.4 | 133 | 52.58964 |
| <b>Bailey County, TX</b>      | 735.1 | 134 | 52.98805 |
| <b>Chambers County, TX</b>    | 735.6 | 135 | 53.38646 |
| <b>Houston County, TX</b>     | 735.7 | 136 | 53.78486 |
| <b>Moore County, TX</b>       | 735.7 | 136 | 53.78486 |
| <b>Wise County, TX</b>        | 736.5 | 138 | 54.58167 |
| <b>Hill County, TX</b>        | 743.6 | 139 | 54.98008 |
| <b>Baylor County, TX</b>      | 745.7 | 140 | 55.37849 |
| <b>Titus County, TX</b>       | 746.2 | 141 | 55.77689 |
| <b>Knox County, TX</b>        | 746.9 | 142 | 56.1753  |
| <b>Dickens County, TX</b>     | 747.2 | 143 | 56.5737  |
| <b>Colorado County, TX</b>    | 747.5 | 144 | 56.97211 |
| <b>Austin County, TX</b>      | 748   | 145 | 57.37052 |
| <b>Matagorda County, TX</b>   | 749.2 | 146 | 57.76892 |

|                                |       |     |          |
|--------------------------------|-------|-----|----------|
| <b>Roberts County, TX</b>      | 749.7 | 147 | 58.16733 |
| <b>Clay County, TX</b>         | 750.1 | 148 | 58.56574 |
| <b>Rusk County, TX</b>         | 751.5 | 149 | 58.96414 |
| <b>Jim Hogg County, TX</b>     | 751.8 | 150 | 59.36255 |
| <b>Kent County, TX</b>         | 755.2 | 151 | 59.76096 |
| <b>Van Zandt County, TX</b>    | 756.5 | 152 | 60.15936 |
| <b>San Patricio County, TX</b> | 758   | 153 | 60.55777 |
| <b>Grayson County, TX</b>      | 759.3 | 154 | 60.95618 |
| <b>Hockley County, TX</b>      | 766   | 155 | 61.35458 |
| <b>Upton County, TX</b>        | 766.8 | 156 | 61.75299 |
| <b>Lynn County, TX</b>         | 768.5 | 157 | 62.15139 |
| <b>McCulloch County, TX</b>    | 768.8 | 158 | 62.5498  |
| <b>Runnels County, TX</b>      | 769.1 | 159 | 62.94821 |
| <b>Gregg County, TX</b>        | 769.4 | 160 | 63.34661 |
| <b>La Salle County, TX</b>     | 770.4 | 161 | 63.74502 |
| <b>Bosque County, TX</b>       | 772.7 | 162 | 64.14342 |
| <b>Atascosa County, TX</b>     | 774.1 | 163 | 64.54183 |
| <b>Jones County, TX</b>        | 775   | 164 | 64.94024 |
| <b>Donley County, TX</b>       | 775   | 164 | 64.94024 |
| <b>Madison County, TX</b>      | 775.7 | 166 | 65.73705 |
| <b>Hunt County, TX</b>         | 777.3 | 167 | 66.13546 |
| <b>Jackson County, TX</b>      | 778.1 | 168 | 66.53387 |
| <b>Cherokee County, TX</b>     | 778.7 | 169 | 66.93227 |
| <b>Grimes County, TX</b>       | 779.3 | 170 | 67.33068 |
| <b>Wharton County, TX</b>      | 780.9 | 171 | 67.72908 |
| <b>Callahan County, TX</b>     | 780.9 | 171 | 67.72908 |
| <b>Lamb County, TX</b>         | 784.1 | 173 | 68.52589 |
| <b>Dallam County, TX</b>       | 784.1 | 173 | 68.52589 |
| <b>Crockett County, TX</b>     | 785.1 | 175 | 69.32271 |
| <b>Refugio County, TX</b>      | 787.1 | 176 | 69.72112 |

|                                 |       |     |          |
|---------------------------------|-------|-----|----------|
| <b>Martin County, TX</b>        | 789.8 | 177 | 70.11952 |
| <b>Ward County, TX</b>          | 791.1 | 178 | 70.51793 |
| <b>Kaufman County, TX</b>       | 791.3 | 179 | 70.91634 |
| <b>Upshur County, TX</b>        | 792.2 | 180 | 71.31474 |
| <b>Montague County, TX</b>      | 793.5 | 181 | 71.71315 |
| <b>Coke County, TX</b>          | 793.9 | 182 | 72.11156 |
| <b>Hardin County, TX</b>        | 794.7 | 183 | 72.50996 |
| <b>Johnson County, TX</b>       | 797.4 | 184 | 72.90836 |
| <b>Henderson County, TX</b>     | 798.8 | 185 | 73.30677 |
| <b>Eastland County, TX</b>      | 803.5 | 186 | 73.70518 |
| <b>Frio County, TX</b>          | 803.7 | 187 | 74.10358 |
| <b>Collingsworth County, TX</b> | 803.8 | 188 | 74.50199 |
| <b>Taylor County, TX</b>        | 805.8 | 189 | 74.9004  |
| <b>Navarro County, TX</b>       | 806   | 190 | 75.29881 |
| <b>Terry County, TX</b>         | 808.6 | 191 | 75.69721 |
| <b>Schleicher County, TX</b>    | 808.9 | 192 | 76.09562 |
| <b>Cochran County, TX</b>       | 810.9 | 193 | 76.49403 |
| <b>Anderson County, TX</b>      | 811.6 | 194 | 76.89243 |
| <b>Nacogdoches County, TX</b>   | 811.9 | 195 | 77.29084 |
| <b>Duval County, TX</b>         | 812.9 | 196 | 77.68924 |
| <b>Andrews County, TX</b>       | 812.9 | 196 | 77.68924 |
| <b>Gray County, TX</b>          | 813.2 | 198 | 78.48605 |
| <b>Harrison County, TX</b>      | 813.4 | 199 | 78.88446 |
| <b>Coryell County, TX</b>       | 815.5 | 200 | 79.28287 |
| <b>Limestone County, TX</b>     | 816.8 | 201 | 79.68127 |
| <b>Panola County, TX</b>        | 820.1 | 202 | 80.07968 |
| <b>Lamar County, TX</b>         | 824.7 | 203 | 80.47809 |
| <b>Crane County, TX</b>         | 826.5 | 204 | 80.8765  |
| <b>Tyler County, TX</b>         | 827.8 | 205 | 81.2749  |
| <b>Crosby County, TX</b>        | 828.4 | 206 | 81.67331 |

|                              |       |     |          |
|------------------------------|-------|-----|----------|
| <b>Stephens County, TX</b>   | 829.6 | 207 | 82.07172 |
| <b>Hall County, TX</b>       | 836.8 | 208 | 82.47012 |
| <b>Delta County, TX</b>      | 838.6 | 209 | 82.86852 |
| <b>Mitchell County, TX</b>   | 838.8 | 210 | 83.26693 |
| <b>Dawson County, TX</b>     | 838.9 | 211 | 83.66534 |
| <b>Sabine County, TX</b>     | 839.8 | 212 | 84.06374 |
| <b>Cass County, TX</b>       | 841.6 | 213 | 84.46215 |
| <b>Robertson County, TX</b>  | 841.9 | 214 | 84.86056 |
| <b>Childress County, TX</b>  | 843.9 | 215 | 85.25896 |
| <b>Trinity County, TX</b>    | 845.1 | 216 | 85.65737 |
| <b>Marion County, TX</b>     | 846.1 | 217 | 86.05578 |
| <b>Falls County, TX</b>      | 850.1 | 218 | 86.45419 |
| <b>Young County, TX</b>      | 851   | 219 | 86.85259 |
| <b>Brown County, TX</b>      | 852.2 | 220 | 87.251   |
| <b>Ochiltree County, TX</b>  | 852.7 | 221 | 87.6494  |
| <b>Ector County, TX</b>      | 853.4 | 222 | 88.04781 |
| <b>Fannin County, TX</b>     | 856   | 223 | 88.44621 |
| <b>Nolan County, TX</b>      | 857.7 | 224 | 88.84462 |
| <b>Wichita County, TX</b>    | 858.4 | 225 | 89.24303 |
| <b>DeWitt County, TX</b>     | 858.7 | 226 | 89.64143 |
| <b>Brooks County, TX</b>     | 859.8 | 227 | 90.03984 |
| <b>Kleberg County, TX</b>    | 860.4 | 228 | 90.43825 |
| <b>Jefferson County, TX</b>  | 863.7 | 229 | 90.83665 |
| <b>Hutchinson County, TX</b> | 864.1 | 230 | 91.23506 |
| <b>Jack County, TX</b>       | 864.4 | 231 | 91.63347 |
| <b>Potter County, TX</b>     | 869.6 | 232 | 92.03188 |
| <b>Morris County, TX</b>     | 871.3 | 233 | 92.43028 |
| <b>Jim Wells County, TX</b>  | 871.9 | 234 | 92.82868 |
| <b>Karnes County, TX</b>     | 875.1 | 235 | 93.22709 |
| <b>Polk County, TX</b>       | 876.2 | 236 | 93.6255  |

|                                 |            |     |          |
|---------------------------------|------------|-----|----------|
| <b>Jasper County, TX</b>        | 878.6      | 237 | 94.0239  |
| <b>Angelina County, TX</b>      | 881.5      | 238 | 94.42231 |
| <b>Reagan County, TX</b>        | 887.3      | 239 | 94.82072 |
| <b>Wilbarger County, TX</b>     | 889.4      | 240 | 95.21912 |
| <b>Shelby County, TX</b>        | 893.3      | 241 | 95.61753 |
| <b>Wheeler County, TX</b>       | 895.1      | 242 | 96.01594 |
| <b>San Augustine County, TX</b> | 896        | 243 | 96.41434 |
| <b>Palo Pinto County, TX</b>    | 903.5      | 244 | 96.81275 |
| <b>Howard County, TX</b>        | 903.6      | 245 | 97.21116 |
| <b>Bowie County, TX</b>         | 904.1      | 246 | 97.60956 |
| <b>Camp County, TX</b>          | 907.5      | 247 | 98.00797 |
| <b>Orange County, TX</b>        | 909.6      | 248 | 98.40637 |
| <b>Red River County, TX</b>     | 911        | 249 | 98.80478 |
| <b>Newton County, TX</b>        | 917.8      | 250 | 99.20319 |
| <b>Winkler County, TX</b>       | 936.2      | 251 | 99.60159 |
| <b>Liberty County, TX</b>       | 979.1      | 252 | 100      |
| <b>Loving County, TX</b>        | Suppressed |     |          |
| <b>King County, TX</b>          | Unreliable |     |          |

---

AAMR: Age-adjusted mortality rate

**Supplemental Table XI.** CVD-related age-adjusted mortality rates per 100,000 stratified by type of CVD in Texas and the United States, 1999-2019.

| Year         | HF/Cardiomyopathy |       | Ischemic heart disease |       | Cerebrovascular disease |       |
|--------------|-------------------|-------|------------------------|-------|-------------------------|-------|
|              | Texas             | US    | Texas                  | US    | Texas                   | US    |
| <b>1999</b>  | 203.5             | 190   | 402.7                  | 385.5 | 177.1                   | 159.9 |
| <b>2000</b>  | 201.4             | 187.7 | 395.4                  | 374.3 | 177.7                   | 157.4 |
| <b>2001</b>  | 200.9             | 183.1 | 382.3                  | 361.3 | 171.2                   | 151.1 |
| <b>2002</b>  | 196.3             | 180.1 | 375.8                  | 354.2 | 168.6                   | 148.1 |
| <b>2003</b>  | 190.3             | 177.9 | 351.8                  | 340.4 | 158.2                   | 141.2 |
| <b>2004</b>  | 183.8             | 171.8 | 329.9                  | 318.3 | 147                     | 132.6 |
| <b>2005</b>  | 182.8             | 172.1 | 327.2                  | 312   | 137.1                   | 124.6 |
| <b>2006</b>  | 177.9             | 163.1 | 299.8                  | 295.6 | 129.4                   | 116.6 |
| <b>2007</b>  | 174               | 156.6 | 286.8                  | 281.6 | 128.5                   | 112   |
| <b>2008</b>  | 169.2             | 155.3 | 274.7                  | 275.7 | 122                     | 108.1 |
| <b>2009</b>  | 162.6             | 148.6 | 264                    | 259.5 | 115.1                   | 102.1 |
| <b>2010</b>  | 166.5             | 148.1 | 262.1                  | 253.3 | 116.5                   | 101.2 |
| <b>2011</b>  | 158.9             | 145.8 | 250.7                  | 245.3 | 112.2                   | 98.8  |
| <b>2012</b>  | 160.6             | 142.9 | 245.3                  | 237.2 | 110.8                   | 96.5  |
| <b>2013</b>  | 162.9             | 145.8 | 243.1                  | 231.5 | 107.7                   | 94.6  |
| <b>2014</b>  | 163.6             | 146   | 236.7                  | 223.2 | 109.5                   | 94.5  |
| <b>2015</b>  | 167.4             | 151.8 | 230.8                  | 220.4 | 111                     | 96.9  |
| <b>2016</b>  | 165.2             | 151   | 224                    | 214.6 | 108.7                   | 96.3  |
| <b>2017</b>  | 168.8             | 154.6 | 224.9                  | 212.8 | 108.7                   | 97.3  |
| <b>2018</b>  | 174               | 157.6 | 226.9                  | 209.5 | 107.3                   | 96.6  |
| <b>2019</b>  | 170.2             | 159.6 | 220.5                  | 204.9 | 105.5                   | 97.1  |
| <b>Total</b> | 174.4             | 160.1 | 278.6                  | 269.9 | 126.2                   | 113   |

HF: Heart Failure

**Supplemental Table XII.** CVD-related age-adjusted mortality rates per 100,000 stratified by various groups in Texas and United States in 2020.

| Year                           | Texas  |        |        | US     |        |        |
|--------------------------------|--------|--------|--------|--------|--------|--------|
|                                | AAMR   | 95% CI | 95% CI | AAMR   | 95% CI | 95% CI |
| <b>Overall</b>                 | 727.6  | 723.7  | 731.6  | 691    | 690    | 692    |
| <b>Female</b>                  | 599.1  | 594.4  | 603.8  | 570.8  | 569.5  | 572    |
| <b>Male</b>                    | 881.9  | 875.3  | 888.4  | 779.4  | 779    | 779.8  |
| <b>NH White</b>                | 723    | 718    | 728.1  | 676.3  | 675.1  | 677.5  |
| <b>NH Black/AA</b>             | 966.5  | 951.8  | 981.2  | 957.6  | 953.8  | 961.4  |
| <b>Hispanics</b>               | 701.4  | 693.6  | 709.2  | 618.8  | 615.6  | 621.9  |
| <b>25-39 years</b>             | 35.8   | 34.3   | 37.3   | 39.9   | 39.4   | 40.4   |
| <b>40-54 years</b>             | 179.3  | 175.7  | 182.8  | 179.9  | 178.8  | 181    |
| <b>55-69 years</b>             | 714.1  | 706.4  | 721.8  | 655.3  | 653.3  | 657.4  |
| <b>70-84 years</b>             | 2391.3 | 2370.7 | 2412   | 2186.9 | 2181.7 | 2192.1 |
| <b>85+ years</b>               | 9541.2 | 9447.1 | 9635.3 | 9545.5 | 9522   | 9568.9 |
| <b>Metropolitan</b>            | 705.3  | 701.1  | 709.5  | 671.3  | 670.2  | 672.4  |
| <b>Nonmetropolitan</b>         | 873.3  | 861.9  | 884.6  | 796.7  | 794    | 799.5  |
| <b>HF/Cardiomyopathy</b>       | 185.7  | 183.7  | 187.7  | 174.2  | 173.7  | 174.7  |
| <b>Ischemic heart disease</b>  | 254.5  | 252.2  | 256.8  | 229.1  | 228.5  | 229.7  |
| <b>Cerebrovascular disease</b> | 119    | 117.4  | 120.5  | 109.1  | 108.7  | 109.5  |

HF: Heart Failure

Crude death rates per 100,000 persons are given for age groups.



Age-adjusted mortality rate per 100,000  585.1 975.2

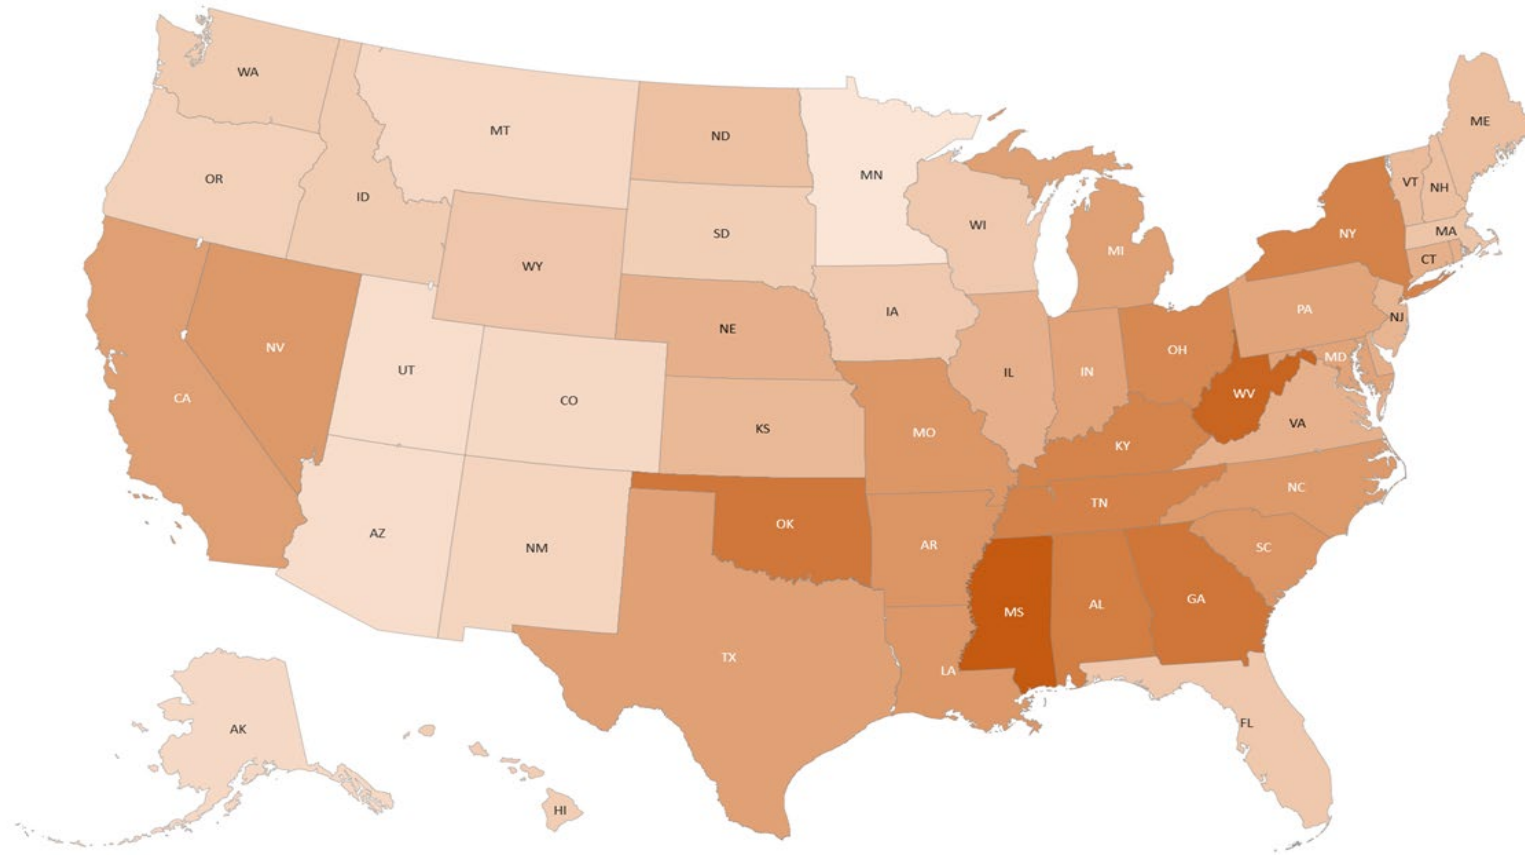

**Supplemental Figure 1A.** State-level DM and CVD-related age-adjusted mortality rates per 100,000 people in the United States, 1999 to 2004.

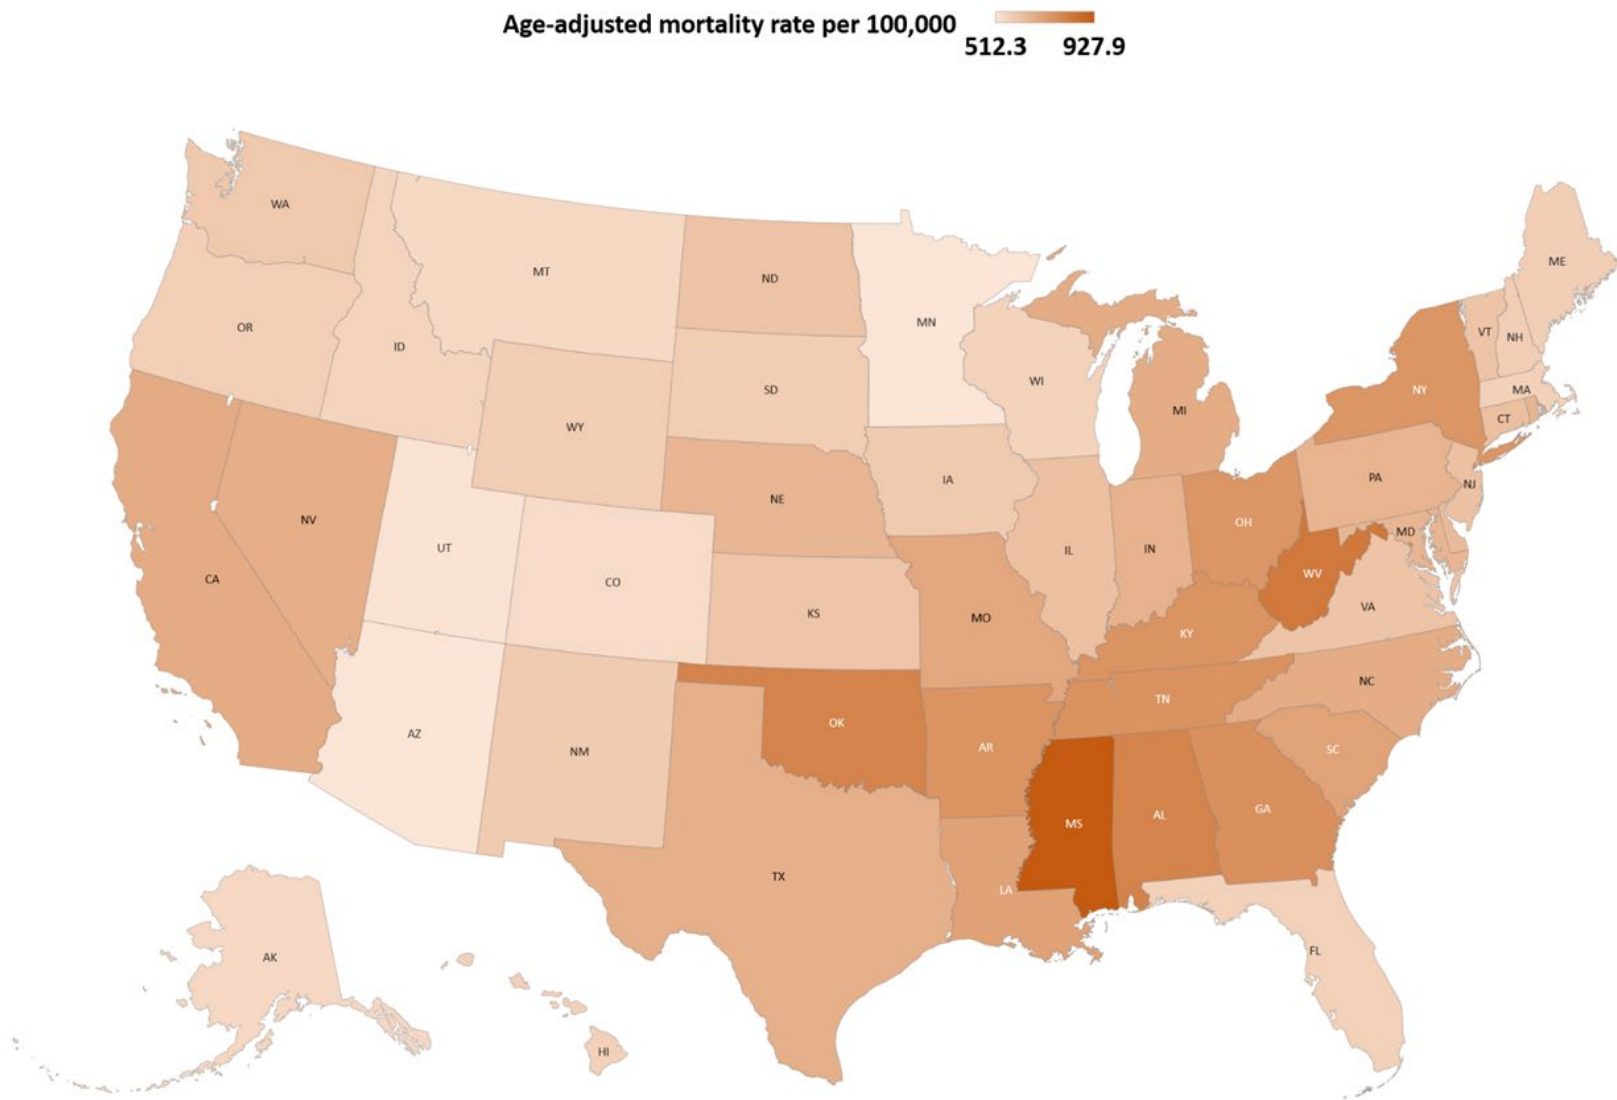

**Supplemental Figure 1B.** State-level DM and CVD-related age-adjusted mortality rates per 100,000 people in the United States, 2005-2009.

Age-adjusted mortality rate per 100,000   
486.5 867.1

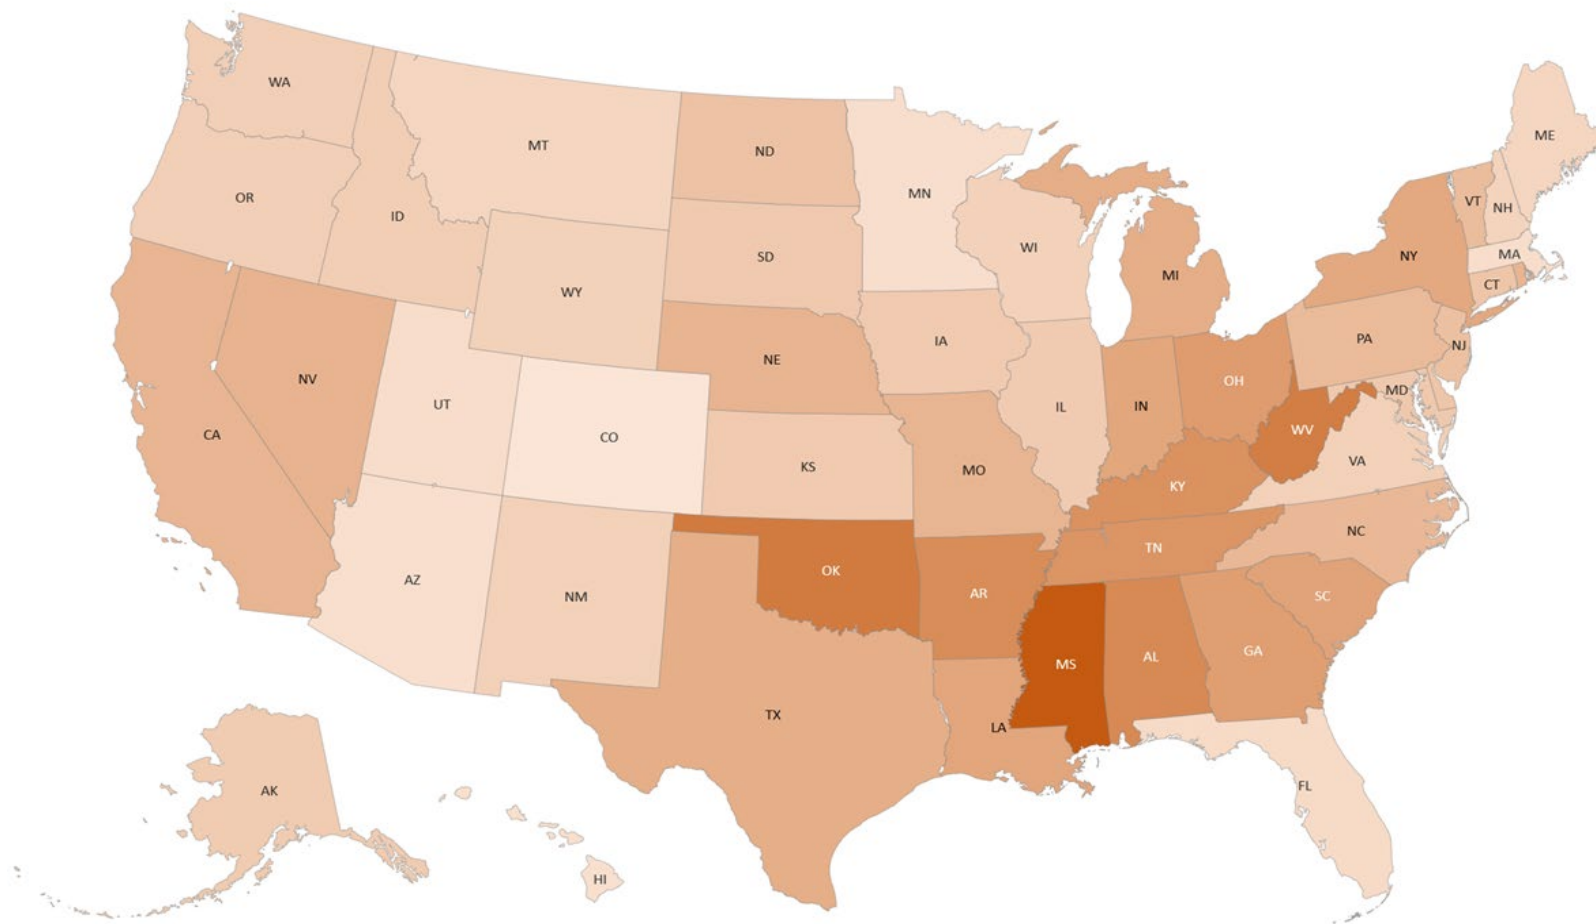

**Supplemental Figure 1C.** State-level DM and CVD-related age-adjusted mortality rates per 100,000 people in the United States, 2009 to 2014.

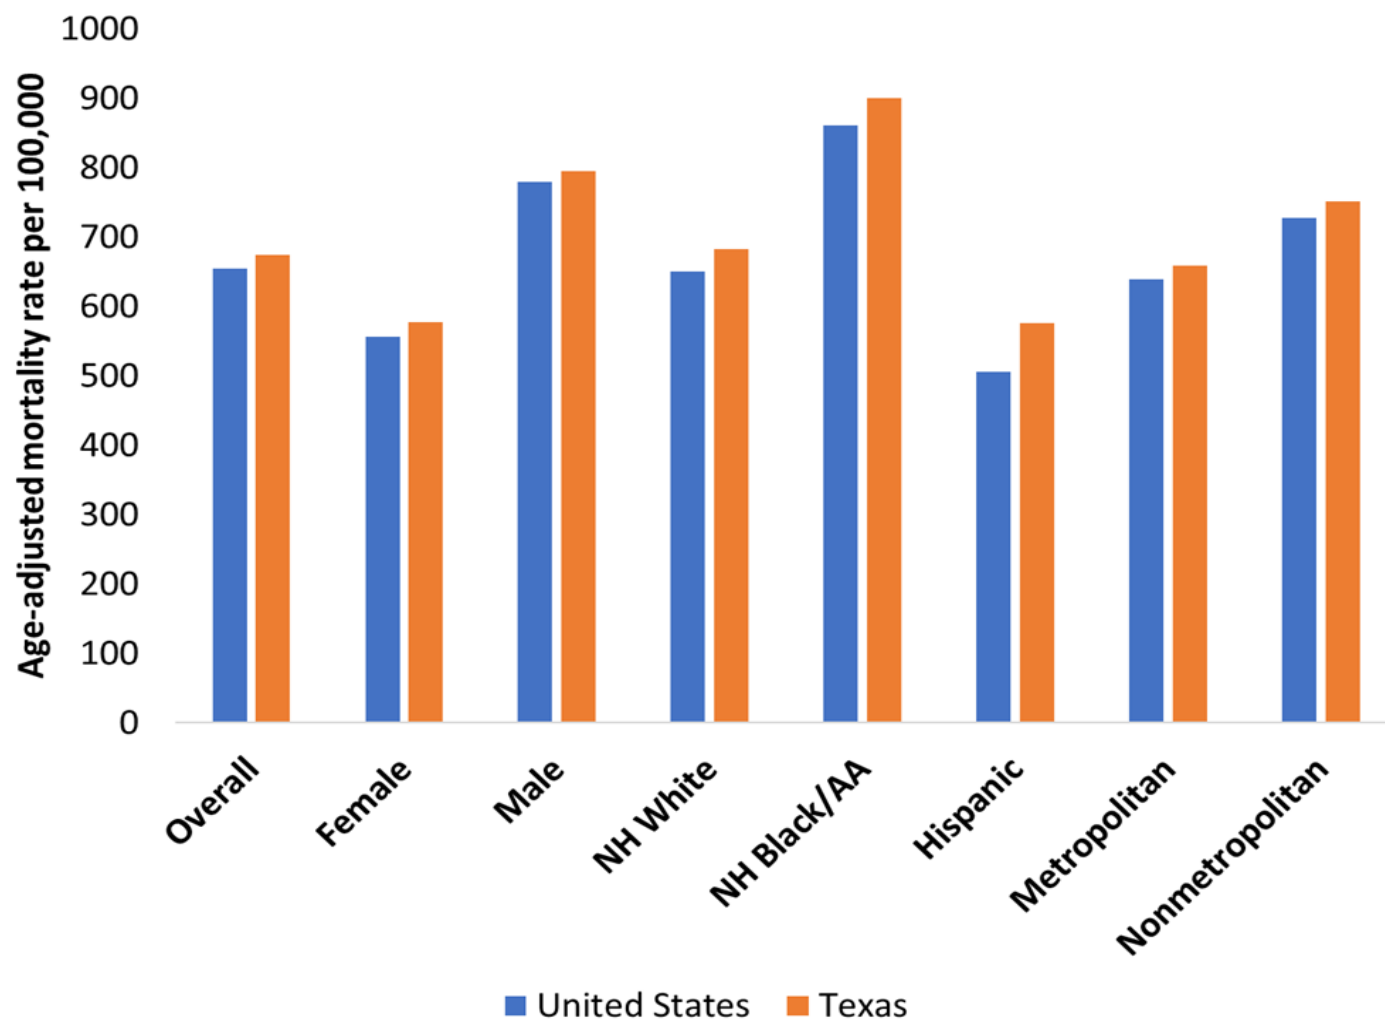

**Supplemental Figure 2A.** CVD-related mortality rates overall and stratified by subgroups in Texas and United States, 1999 to 2019.

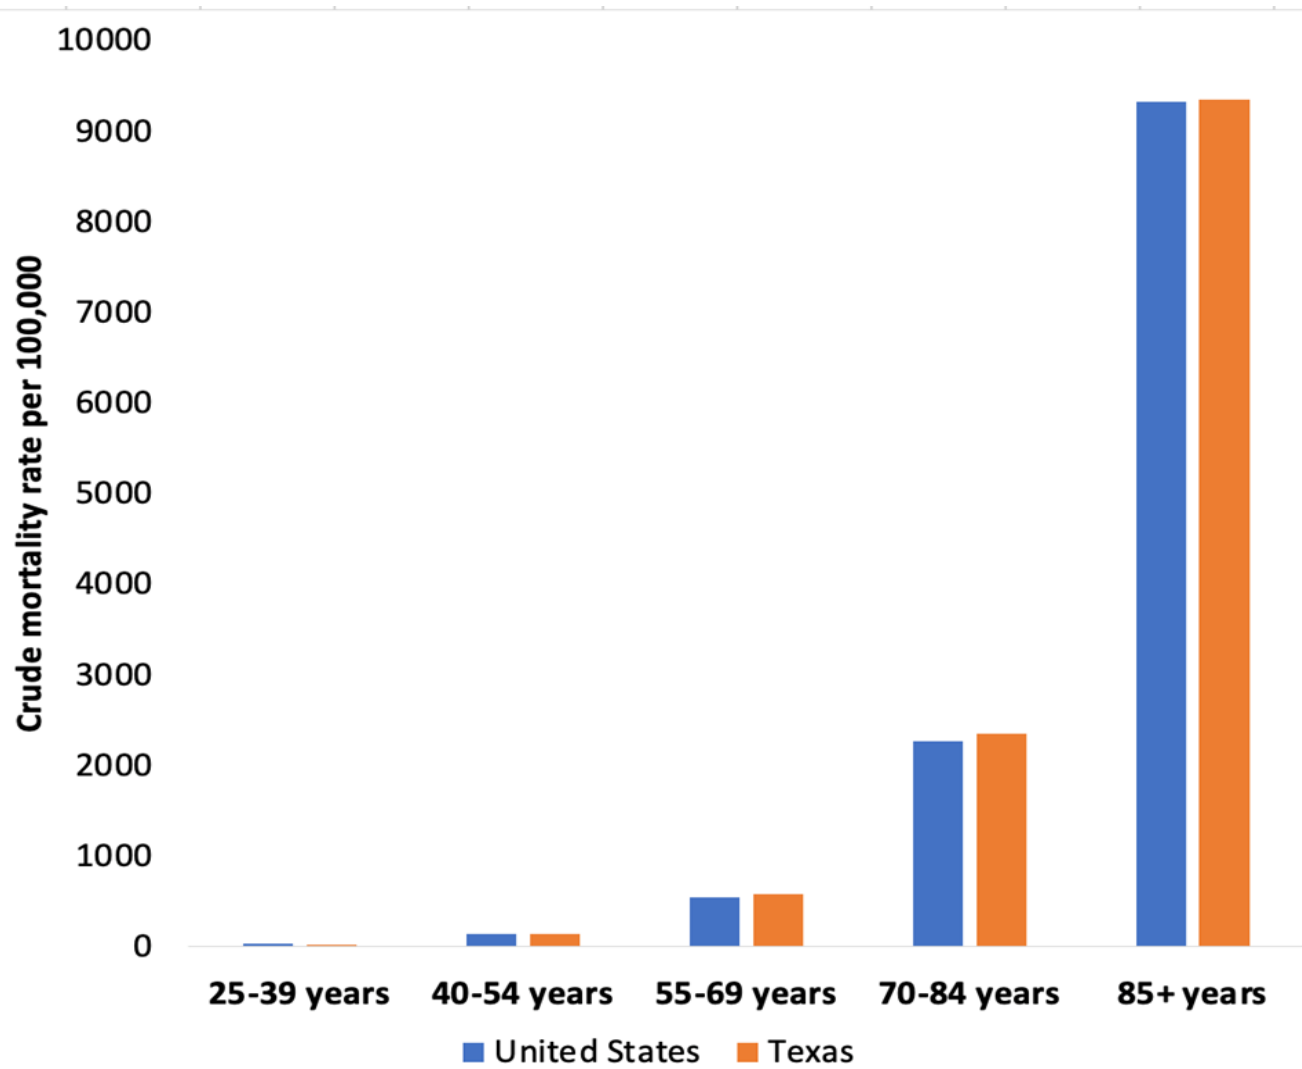

**Supplemental Figure 2B.** CVD-related mortality rates stratified by age groups in Texas and United States, 1999 to 2019.

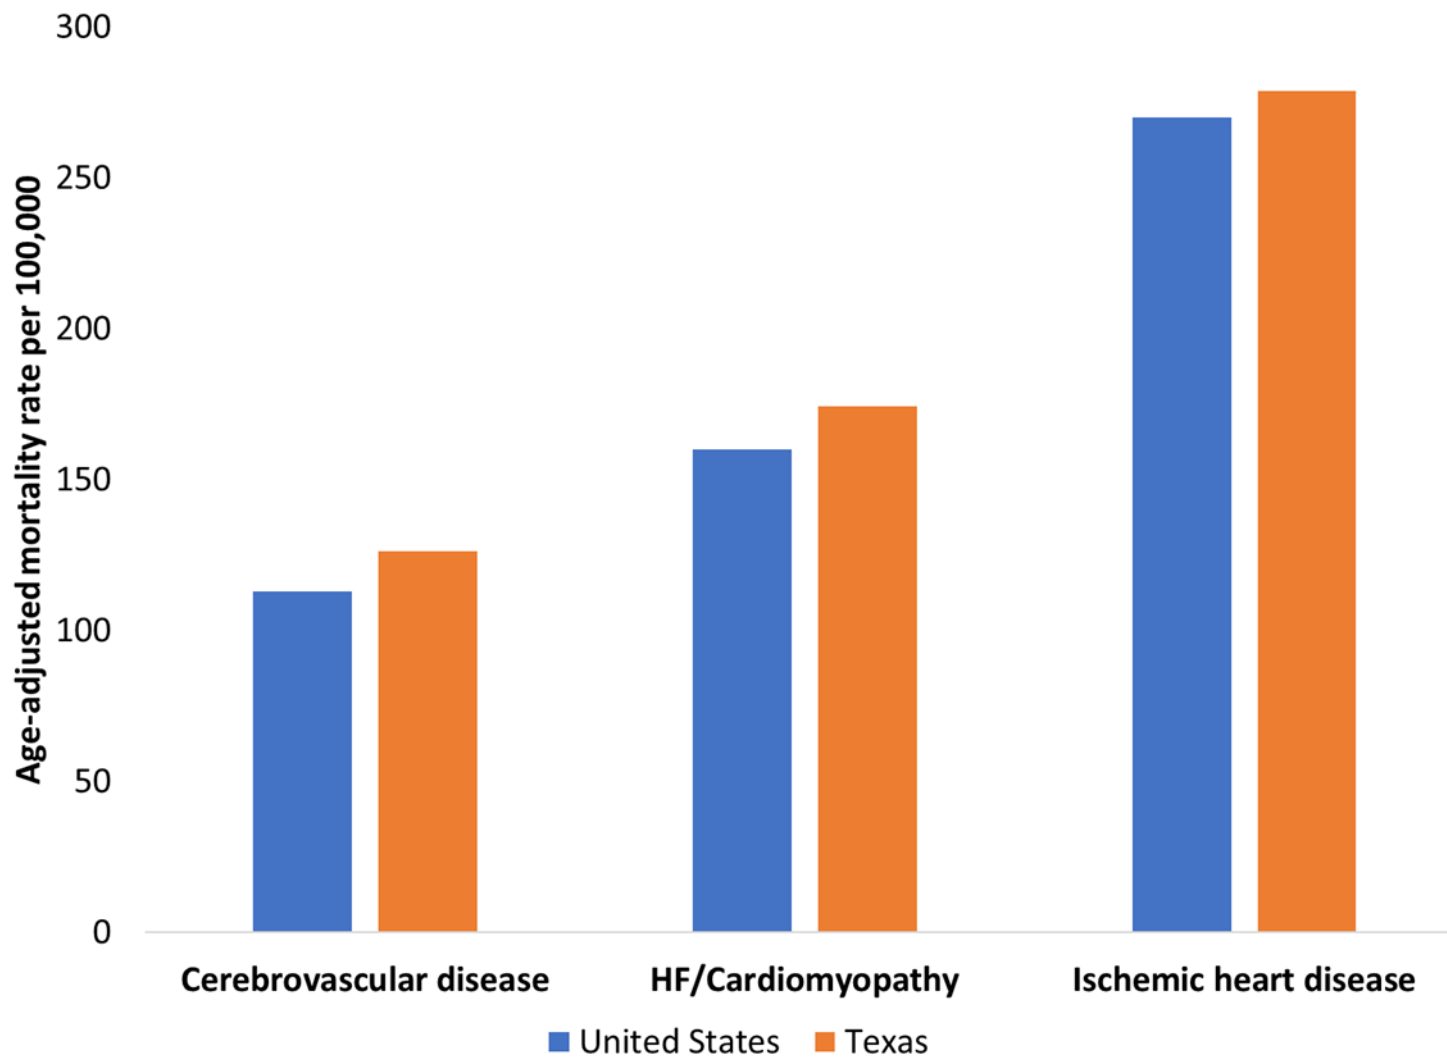

**Supplemental Figure 2C.** CVD-related mortality rates stratified by type of CVD in Texas and United States, 1999 to 2019.

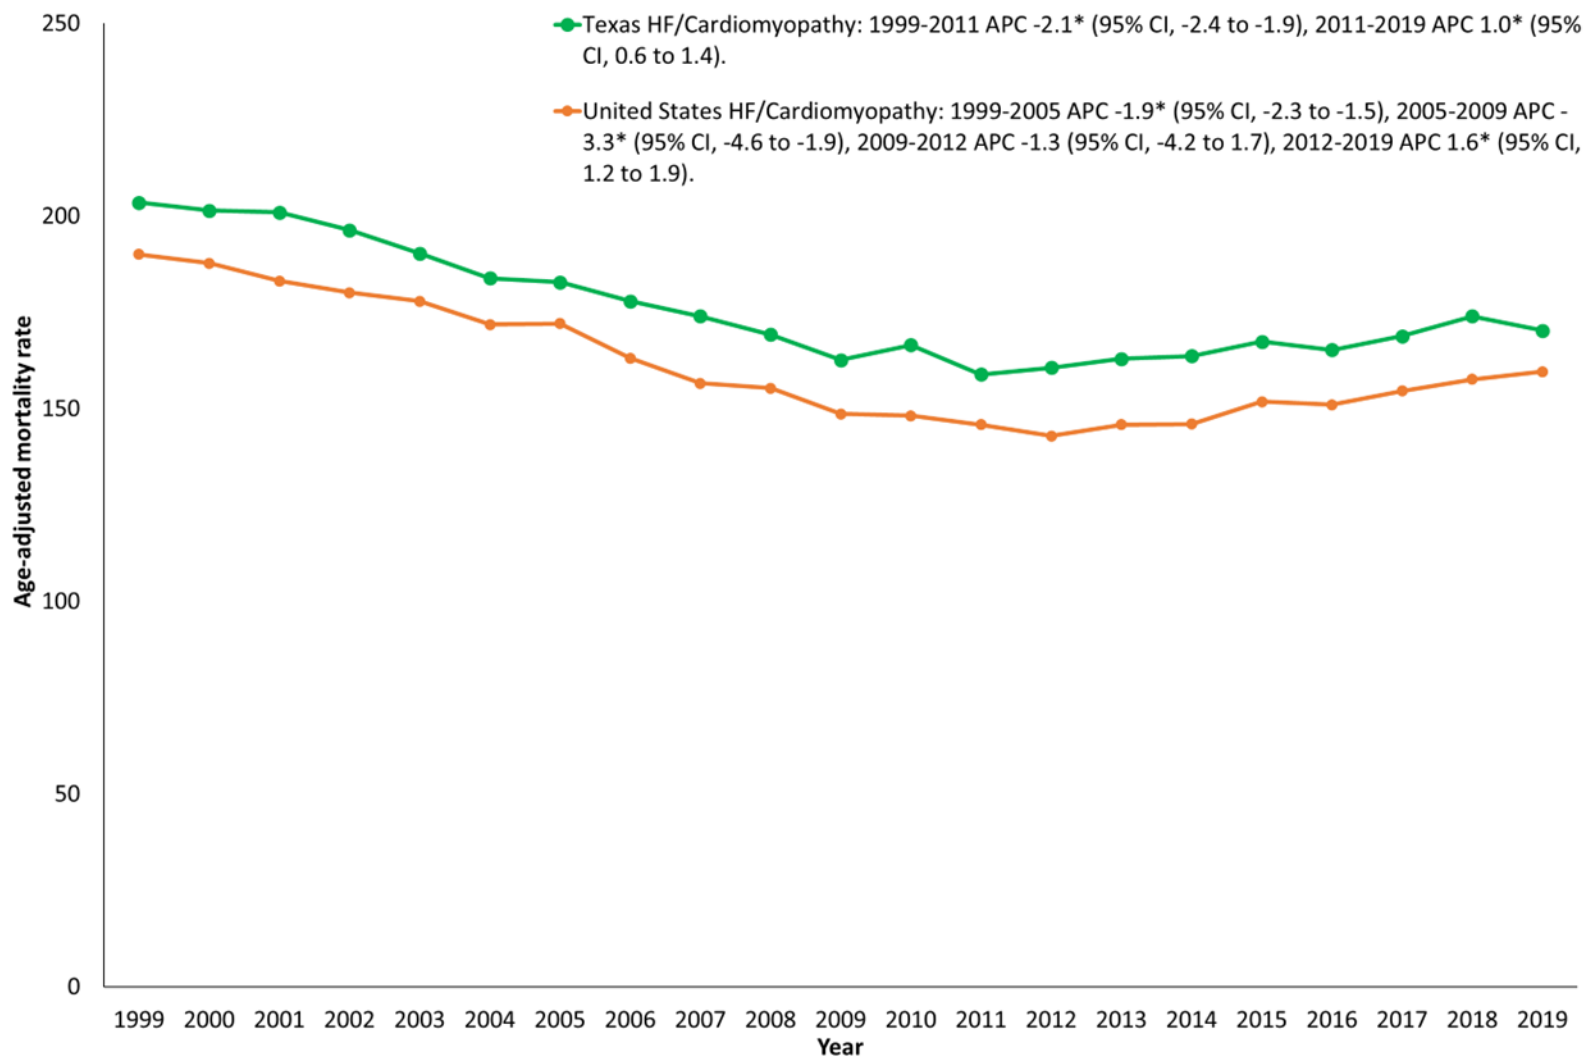

**Supplemental Figure 3A.** Heart failure/cardiomyopathy–related mortality rates in Texas and United States, 1999 to 2019.

\*Indicates that the annual percentage change (APC) is significantly different from zero at  $\alpha=0.05$ .

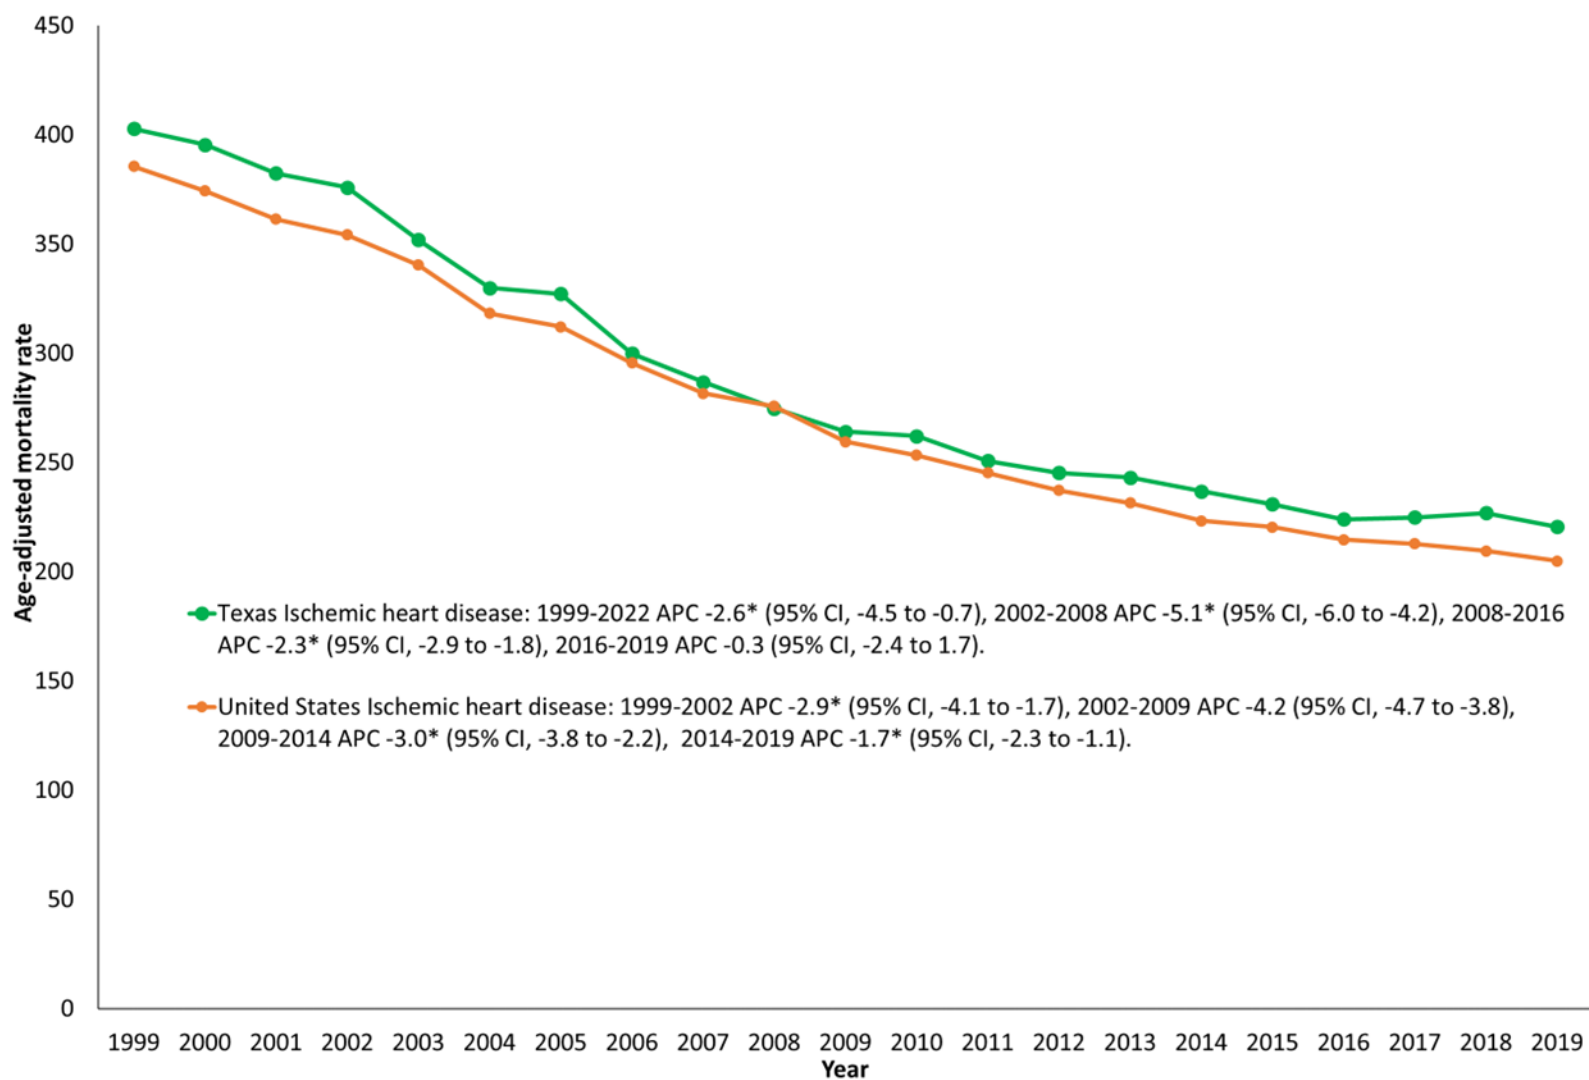

**Supplemental Figure 3B.** Ischemic heart disease–related mortality rates in Texas and United States, 1999 to 2019.

\*Indicates that the annual percentage change (APC) is significantly different from zero at  $\alpha=0.05$ .



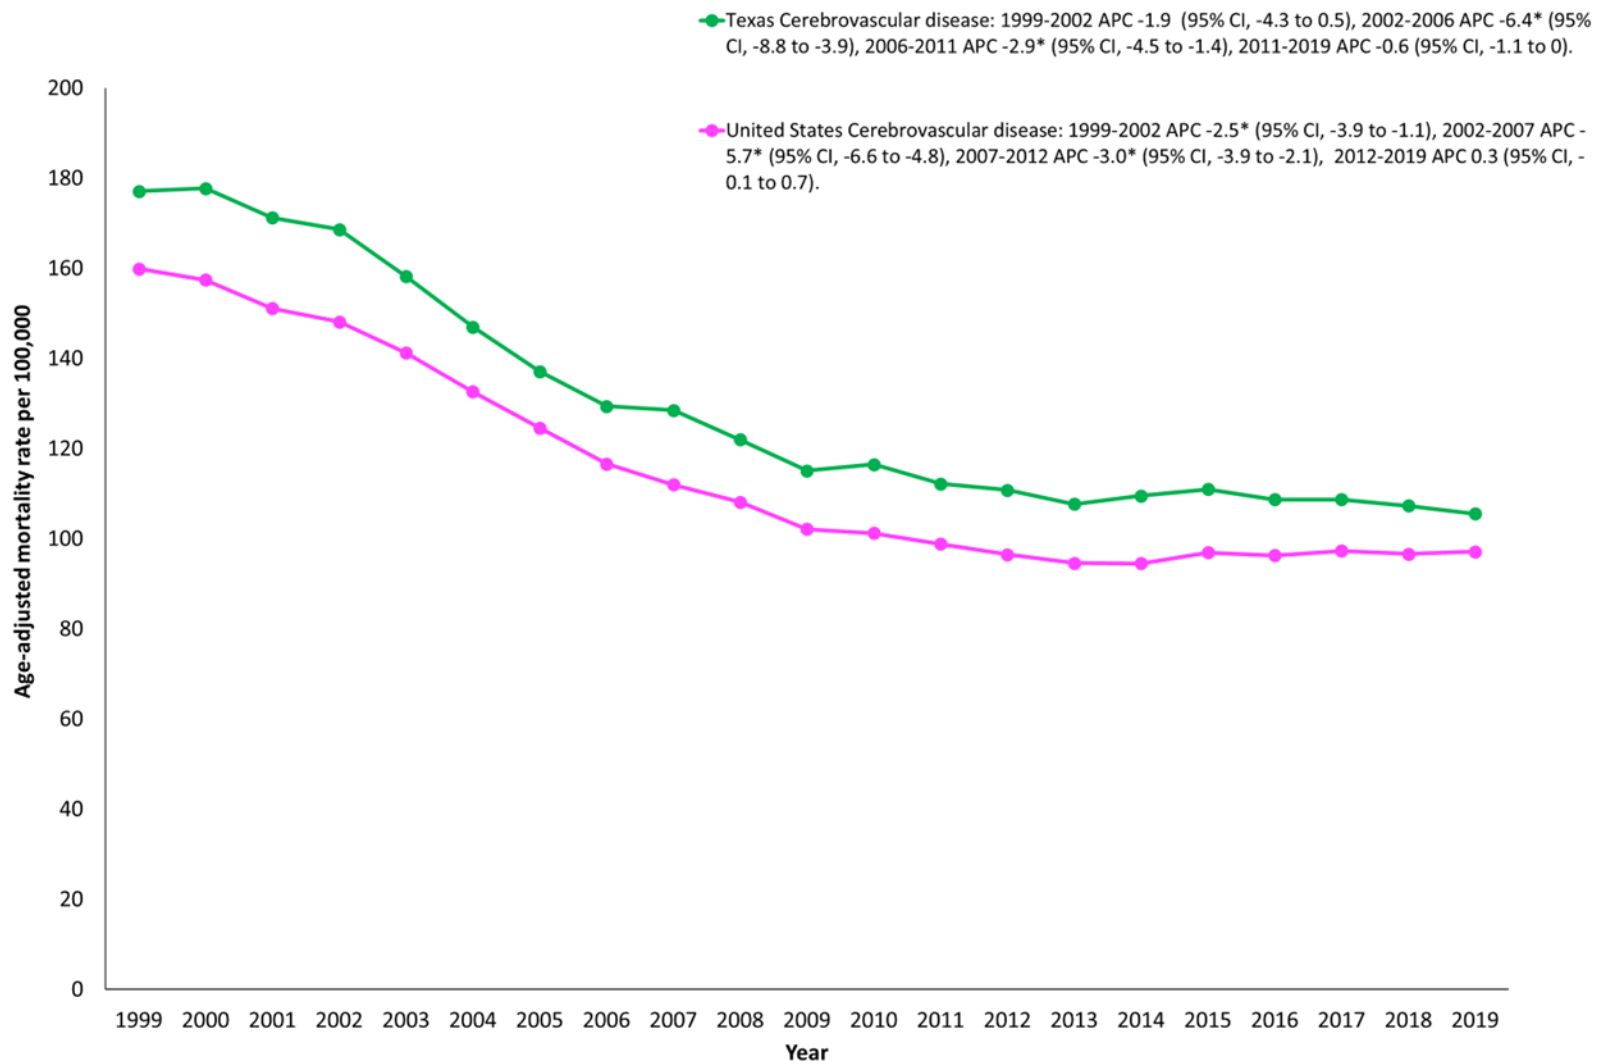

**Supplemental Figure 3C.** Cerebrovascular disease-related mortality rates in Texas and United States, 1999 to 2019.

\*Indicates that the annual percentage change (APC) is significantly different from zero to  $\alpha=0.05$ .
